# Supplementary material for: DNA methylation contributes to natural human variation
Source: HighWire-hosted journal article supplement (doi:10.1101/gr.154187.112), 2013-08-01
Supplement: Supplemental_Tables.pdf [file Supplemental_Tables.pdf]

**Supplemental table S1:**

439 differentially methylated CpG sites between African (AF), Caucasian (CA) and Asian (AS) individuals.

| TargetID   | DNA methylation |      |      | FDR      | Chr. | Position  | Gene          | Feature                 | Variance | meQTL |
|------------|-----------------|------|------|----------|------|-----------|---------------|-------------------------|----------|-------|
|            | AF              | CA   | AS   |          |      |           |               |                         |          |       |
| cg13549940 | 0.64            | 0.81 | 0.81 | 2.30E-12 | 1    | 6390053   | ACOT7         | Body                    | AF       | yes   |
| cg06957310 | 0.57            | 0.76 | 0.73 | 4.74E-15 | 17   | 29283870  | ADAP2         | Body;ncRNA promoter     | AF       | yes   |
| cg20490392 | 0.81            | 0.69 | 0.73 | 2.55E-04 | 8    | 6419438   | ANGPT2;MCPH1  | Body;Body               | AF       | no    |
| cg25350011 | 0.79            | 0.64 | 0.68 | 1.45E-04 | 8    | 6419483   | ANGPT2;MCPH1  | Body;Body               | AF       | no    |
| cg26741686 | 0.69            | 0.78 | 0.82 | 4.46E-06 | 4    | 186318356 | ANKRD37       | Body                    | AF       | yes   |
| cg24424889 | 0.39            | 0.27 | 0.32 | 5.96E-07 | 22   | 39494175  | APOBEC3H      | Promoter                | AF       | yes   |
| cg10435235 | 0.45            | 0.29 | 0.32 | 3.54E-06 | 13   | 111956623 | ARHGEF7       | 3'UTR                   | AF       | no    |
| cg18929511 | 0.56            | 0.42 | 0.48 | 1.07E-04 | 8    | 17942993  | ASAH1         | Promoter                | AF       | yes   |
| cg19203115 | 0.43            | 0.29 | 0.33 | 1.34E-06 | 18   | 29263741  | B4GALT6       | Body;ncRNA promoter     | AF       | no    |
| cg27284398 | 0.54            | 0.37 | 0.41 | 2.32E-10 | 19   | 14014213  | C19orf57      | Body                    | AF       | yes   |
| cg25234359 | 0.48            | 0.33 | 0.37 | 5.53E-06 | 19   | 18699219  | C19orf60      | Promoter                | AF       | yes   |
| cg15007983 | 0.38            | 0.26 | 0.27 | 1.66E-04 | 19   | 18699326  | C19orf60      | Promoter                | AF       | yes   |
| cg11766577 | 0.61            | 0.72 | 0.80 | 3.97E-09 | 21   | 47581405  | SPATC1L       | Body                    | AF       | yes   |
| cg13126279 | 0.62            | 0.73 | 0.80 | 2.48E-08 | 21   | 47581558  | SPATC1L       | Body                    | AF       | yes   |
| cg14789911 | 0.60            | 0.72 | 0.79 | 4.66E-12 | 21   | 47582049  | SPATC1L       | Body                    | AF       | yes   |
| cg07747299 | 0.34            | 0.22 | 0.18 | 2.34E-07 | 21   | 47604052  | SPATC1L       | Promoter;ncRNA promoter | AF       | yes   |
| cg08742575 | 0.39            | 0.23 | 0.18 | 4.55E-10 | 21   | 47604166  | SPATC1L       | Promoter;ncRNA promoter | AF       | yes   |
| cg12016809 | 0.41            | 0.25 | 0.19 | 6.84E-09 | 21   | 47604291  | SPATC1L       | Promoter;ncRNA promoter | AF       | yes   |
| cg05896524 | 0.41            | 0.30 | 0.22 | 9.27E-07 | 21   | 47604654  | SPATC1L       | Promoter;ncRNA promoter | AF       | yes   |
| cg02578087 | 0.30            | 0.18 | 0.18 | 2.54E-04 | 3    | 8671361   | C3orf32       | Body                    | AF       | no    |
| cg13535736 | 0.64            | 0.51 | 0.57 | 2.46E-05 | 9    | 111863775 | C9orf5        | Body                    | AF       | no    |
| cg19283806 | 0.61            | 0.50 | 0.47 | 1.41E-03 | 18   | 66389420  | CCDC102B      | Promoter                | AF       | yes   |
| cg19463256 | 0.81            | 0.67 | 0.72 | 1.22E-06 | 19   | 46915351  | CCDC8         | Promoter                | AF       | no    |
| cg24851651 | 0.81            | 0.59 | 0.68 | 8.09E-08 | 11   | 66362959  | CCS           | Body                    | AF       | yes   |
| cg13164537 | 0.43            | 0.52 | 0.55 | 5.30E-05 | 18   | 67624071  | CD226         | Promoter                | AF       | no    |
| cg26848442 | 0.59            | 0.68 | 0.71 | 8.40E-05 | 18   | 67624264  | CD226         | Promoter                | AF       | yes   |
| cg23611477 | 0.89            | 0.81 | 0.75 | 4.11E-11 | 1    | 1644835   | CDK11A;CDK11B | Body;Promoter           | AF       | yes   |
| cg00669623 | 0.28            | 0.15 | 0.14 | 2.76E-17 | 1    | 1655867   | CDK11B;CDK11A | Promoter                | AF       | no    |
| cg18190219 | 0.55            | 0.67 | 0.70 | 2.10E-09 | 22   | 46762943  | CELSR1        | Body                    | AF       | yes   |
| cg17099656 | 0.22            | 0.37 | 0.36 | 4.42E-07 | 22   | 47135171  | CERK          | Promoter                | AF       | yes   |

|            |      |      |      |          |    |           |                |                     |    |     |
|------------|------|------|------|----------|----|-----------|----------------|---------------------|----|-----|
| cg25114630 | 0.16 | 0.03 | 0.03 | 1.23E-12 | 15 | 101792522 | CHSY1          | Promoter            | AF | yes |
| cg19276111 | 0.43 | 0.55 | 0.49 | 2.33E-03 | 1  | 24229232  | CNR2           | Promoter            | AF | no  |
| cg17713488 | 0.21 | 0.41 | 0.36 | 3.81E-07 | 19 | 10077935  | COL5A3         | Body                | AF | yes |
| cg06285241 | 0.30 | 0.20 | 0.15 | 6.56E-20 | 14 | 105944655 | CRIP2          | Body                | AF | no  |
| cg04329125 | 0.61 | 0.52 | 0.43 | 2.32E-07 | 14 | 105945022 | CRIP2          | Body                | AF | no  |
| cg27279301 | 0.49 | 0.33 | 0.31 | 6.71E-11 | 14 | 105945287 | CRIP2          | Body                | AF | no  |
| cg22718636 | 0.22 | 0.42 | 0.34 | 5.29E-06 | 4  | 961658    | DGKQ           | Body                | AF | yes |
| cg12856521 | 0.38 | 0.24 | 0.22 | 2.62E-09 | 11 | 46389249  | DGKZ           | Body                | AF | no  |
| cg20291162 | 0.40 | 0.52 | 0.55 | 5.68E-07 | 17 | 40259547  | DHX58          | Body                | AF | yes |
| cg02228675 | 0.09 | 0.18 | 0.22 | 5.35E-08 | 17 | 40259724  | DHX58          | Body                | AF | yes |
| cg09219688 | 0.65 | 0.44 | 0.49 | 4.51E-11 | 10 | 11789383  | ECHDC3         | Body                | AF | yes |
| cg02678768 | 0.45 | 0.29 | 0.24 | 2.79E-17 | 17 | 74002944  | EVPL           | 3'UTR               | AF | yes |
| cg17765387 | 0.31 | 0.48 | 0.46 | 1.48E-08 | 12 | 117354824 | FBXW8          | Body                | AF | yes |
| cg26988138 | 0.62 | 0.53 | 0.49 | 8.46E-04 | 19 | 2639424   | GNG7           | Promoter            | AF | no  |
| cg26922917 | 0.75 | 0.69 | 0.62 | 1.93E-05 | 12 | 131622584 | GPR133         | Body                | AF | no  |
| cg09408571 | 0.59 | 0.66 | 0.75 | 5.84E-07 | 1  | 101003634 | GPR88          | Promoter            | AF | yes |
| cg09796376 | 0.29 | 0.17 | 0.14 | 2.63E-28 | 20 | 30640595  | HCK            | Body                | AF | yes |
| cg20408074 | 0.42 | 0.35 | 0.28 | 2.66E-07 | 6  | 31325817  | HLA-B          | Promoter            | AF | no  |
| cg00620824 | 0.39 | 0.32 | 0.24 | 6.51E-08 | 6  | 31240784  | HLA-C          | Promoter            | AF | no  |
| cg24918767 | 0.40 | 0.25 | 0.28 | 8.94E-09 | 4  | 88297189  | HSD17B11       | Body                | AF | no  |
| cg06546677 | 0.50 | 0.66 | 0.66 | 1.25E-05 | 8  | 145537504 | HSF1           | Body;ncRNA promoter | AF | yes |
| cg11132204 | 0.71 | 0.81 | 0.84 | 1.63E-07 | 11 | 9405884   | IPO7           | Promoter            | AF | yes |
| cg02817932 | 0.34 | 0.49 | 0.64 | 1.80E-17 | 16 | 85683584  | KIAA0182       | Body                | AF | yes |
| cg06935979 | 0.62 | 0.48 | 0.46 | 1.01E-06 | 1  | 232941706 | KIAA1383       | Promoter            | AF | yes |
| cg00951395 | 0.49 | 0.32 | 0.33 | 7.12E-09 | 1  | 232941775 | KIAA1383       | Promoter            | AF | yes |
| cg19368911 | 0.61 | 0.70 | 0.75 | 1.01E-07 | 1  | 245541456 | KIF26B         | Body                | AF | no  |
| cg02592271 | 0.62 | 0.69 | 0.74 | 2.43E-05 | 2  | 27665507  | KRTCAP3        | Body                | AF | no  |
| cg14781242 | 0.66 | 0.81 | 0.84 | 9.37E-14 | 1  | 32738251  | LCK            | Promoter            | AF | yes |
| cg01201279 | 0.50 | 0.64 | 0.78 | 5.46E-17 | 3  | 156543471 | LEKR1          | Promoter            | AF | yes |
| cg15260248 | 0.72 | 0.81 | 0.86 | 2.14E-07 | 3  | 189829092 | LEPREL1        | Promoter            | AF | yes |
| cg11036041 | 0.45 | 0.29 | 0.29 | 2.50E-13 | 4  | 41365307  | LIMCH1         | Body                | AF | no  |
| cg22961457 | 0.39 | 0.31 | 0.25 | 3.40E-06 | 20 | 62370310  | LIME1;SLC2A4RG | 3'UTR;Promoter      | AF | no  |
| cg15544633 | 0.07 | 0.15 | 0.22 | 2.79E-13 | 2  | 99771531  | LIPT1          | Promoter            | AF | yes |
| cg27084952 | 0.41 | 0.54 | 0.52 | 3.69E-21 | 16 | 980146    | LMF1           | Body                | AF | yes |
| cg06722407 | 0.45 | 0.53 | 0.58 | 5.68E-05 | 13 | 19918586  | LOC100101938   | Body;ncRNA promoter | AF | no  |
| cg16172923 | 0.59 | 0.67 | 0.75 | 8.70E-07 | 7  | 1883390   | MAD1L1         | Body;ncRNA promoter | AF | no  |
| cg16658412 | 0.47 | 0.57 | 0.63 | 9.76E-07 | 7  | 1883420   | MAD1L1         | Body;ncRNA promoter | AF | no  |

|            |      |      |      |          |    |           |          |                         |    |     |
|------------|------|------|------|----------|----|-----------|----------|-------------------------|----|-----|
| cg05095590 | 0.26 | 0.37 | 0.38 | 2.46E-03 | 7  | 2139259   | MAD1L1   | Body                    | AF | no  |
| cg14926196 | 0.45 | 0.61 | 0.62 | 3.50E-07 | 6  | 37616482  | MDGA1    | Body                    | AF | yes |
| cg24796644 | 0.37 | 0.51 | 0.55 | 9.72E-06 | 6  | 37617956  | MDGA1    | Body                    | AF | yes |
| cg02493602 | 0.46 | 0.37 | 0.34 | 2.38E-03 | 11 | 86383696  | ME3      | Promoter                | AF | no  |
| cg08471713 | 0.50 | 0.39 | 0.33 | 1.07E-06 | 17 | 41738893  | MEOX1    | Promoter                | AF | yes |
| cg19478698 | 0.74 | 0.59 | 0.64 | 1.91E-09 | 3  | 195530151 | MUC4     | Body                    | AF | yes |
| cg11440486 | 0.84 | 0.69 | 0.58 | 7.67E-17 | 17 | 48585216  | MYCBPAP  | Promoter;ncRNA promoter | AF | yes |
| cg00901687 | 0.88 | 0.67 | 0.56 | 1.85E-25 | 17 | 48585270  | MYCBPAP  | Promoter;ncRNA promoter | AF | yes |
| cg12235788 | 0.29 | 0.14 | 0.17 | 2.73E-12 | 3  | 123476518 | MYLK     | Body                    | AF | yes |
| cg21667061 | 0.53 | 0.45 | 0.40 | 3.81E-04 | 15 | 60772094  | NARG2    | Promoter;ncRNA promoter | AF | no  |
| cg09829573 | 0.66 | 0.58 | 0.53 | 8.38E-14 | 1  | 144692074 | NBPF9    | Body                    | AF | no  |
| cg12425861 | 0.28 | 0.11 | 0.11 | 2.32E-20 | 14 | 105830606 | PACS2    | Body                    | AF | yes |
| cg18397450 | 0.33 | 0.12 | 0.13 | 3.96E-22 | 14 | 105830631 | PACS2    | Body                    | AF | yes |
| cg19499452 | 0.23 | 0.04 | 0.06 | 6.01E-22 | 14 | 105830721 | PACS2    | Body                    | AF | yes |
| cg18912855 | 0.22 | 0.03 | 0.05 | 4.92E-22 | 14 | 105830859 | PACS2    | Body                    | AF | yes |
| cg15948536 | 0.46 | 0.28 | 0.35 | 8.76E-09 | 4  | 169770092 | PALLD    | Promoter                | AF | yes |
| cg06103394 | 0.28 | 0.09 | 0.09 | 4.84E-16 | 16 | 3018991   | PAQR4    | Promoter                | AF | yes |
| cg22681709 | 0.44 | 0.27 | 0.28 | 1.86E-09 | 2  | 178499509 | PDE11A   | Body                    | AF | yes |
| cg08900409 | 0.49 | 0.62 | 0.59 | 1.02E-04 | 19 | 18475669  | PGPEP1   | 3'UTR                   | AF | yes |
| cg12091331 | 0.58 | 0.70 | 0.75 | 7.33E-08 | 8  | 42065314  | PLAT     | Promoter                | AF | no  |
| cg06064179 | 0.76 | 0.88 | 0.88 | 1.22E-11 | 17 | 62829976  | PLEKHM1P | Body                    | AF | no  |
| cg25120325 | 0.78 | 0.70 | 0.65 | 6.96E-09 | 10 | 118380370 | PNLIPRP2 | Promoter                | AF | yes |
| cg11609571 | 0.44 | 0.51 | 0.56 | 1.26E-03 | 5  | 145215629 | PRELID2  | Promoter                | AF | yes |
| cg22410499 | 0.43 | 0.30 | 0.30 | 6.50E-05 | 9  | 33749216  | PRSS3    | Promoter                | AF | yes |
| cg10599438 | 0.43 | 0.35 | 0.29 | 3.09E-03 | 19 | 844589    | PRTN3    | Body                    | AF | yes |
| cg04520948 | 0.20 | 0.04 | 0.08 | 1.93E-13 | 3  | 184016710 | PSMD2    | Promoter                | AF | yes |
| cg00632811 | 0.53 | 0.43 | 0.38 | 4.52E-05 | 12 | 108078821 | PWP1     | Promoter                | AF | yes |
| cg25345738 | 0.61 | 0.48 | 0.41 | 6.40E-07 | 12 | 108078835 | PWP1     | Promoter                | AF | yes |
| cg12092579 | 0.38 | 0.23 | 0.29 | 2.07E-06 | 1  | 178380975 | RASAL2   | Body                    | AF | no  |
| cg08896939 | 0.19 | 0.30 | 0.35 | 2.23E-07 | 17 | 29297380  | RNF135   | Promoter                | AF | yes |
| cg04193820 | 0.15 | 0.28 | 0.29 | 4.15E-08 | 17 | 29297414  | RNF135   | Promoter                | AF | yes |
| cg13458384 | 0.58 | 0.48 | 0.46 | 1.08E-06 | 9  | 136567339 | SARDH    | Body                    | AF | yes |
| cg00101728 | 0.40 | 0.56 | 0.54 | 1.36E-07 | 6  | 2953027   | SERPINB6 | Body                    | AF | yes |
| cg14150973 | 0.20 | 0.09 | 0.06 | 3.89E-21 | 19 | 40950431  | SERTAD3  | Promoter                | AF | yes |
| cg01448863 | 0.62 | 0.49 | 0.55 | 3.58E-10 | 14 | 70264043  | SLC10A1  | Promoter                | AF | no  |
| cg21088438 | 0.61 | 0.48 | 0.52 | 3.23E-06 | 14 | 70264869  | SLC10A1  | Promoter                | AF | yes |
| cg05964212 | 0.48 | 0.35 | 0.39 | 5.53E-07 | 3  | 48936979  | SLC25A20 | Promoter                | AF | no  |

|            |      |      |      |          |    |           |         |                     |    |     |
|------------|------|------|------|----------|----|-----------|---------|---------------------|----|-----|
| cg11146691 | 0.38 | 0.46 | 0.50 | 1.71E-02 | 12 | 47219737  | SLC38A4 | Promoter            | AF | yes |
| cg24940967 | 0.66 | 0.51 | 0.57 | 1.12E-03 | 3  | 45837197  | SLC6A20 | Body                | AF | no  |
| cg13375589 | 0.50 | 0.57 | 0.62 | 3.02E-03 | 17 | 4487125   | SMTNL2  | Promoter            | AF | yes |
| cg20729813 | 0.76 | 0.64 | 0.66 | 3.68E-05 | 4  | 7502429   | SORCS2  | Body                | AF | no  |
| cg06712013 | 0.60 | 0.45 | 0.48 | 2.24E-05 | 12 | 49759545  | SPATS2  | Promoter            | AF | no  |
| cg18872420 | 0.62 | 0.75 | 0.85 | 4.57E-12 | 14 | 78023429  | SPTLC2  | Body                | AF | yes |
| cg23433370 | 0.59 | 0.52 | 0.46 | 3.82E-03 | 12 | 27396894  | STK38L  | Promoter            | AF | yes |
| cg06008345 | 0.48 | 0.35 | 0.39 | 1.44E-10 | 10 | 71176719  | TACR2   | Promoter            | AF | yes |
| cg00810292 | 0.49 | 0.65 | 0.62 | 6.84E-05 | 13 | 75900518  | TBC1D4  | Body                | AF | yes |
| cg07189381 | 0.45 | 0.34 | 0.33 | 1.64E-06 | 19 | 55660514  | TNNT1   | Promoter            | AF | no  |
| cg24699670 | 0.33 | 0.22 | 0.21 | 1.24E-07 | 19 | 55660614  | TNNT1   | Promoter            | AF | yes |
| cg10218876 | 0.41 | 0.24 | 0.24 | 3.70E-09 | 19 | 55660625  | TNNT1   | Promoter            | AF | yes |
| cg12970512 | 0.66 | 0.52 | 0.53 | 6.72E-05 | 14 | 103251610 | TRAF3   | Promoter            | AF | no  |
| cg20916523 | 0.50 | 0.42 | 0.34 | 1.19E-03 | 3  | 10184584  | VHL     | Body;ncRNA promoter | AF | yes |
| cg02750262 | 0.50 | 0.41 | 0.35 | 1.01E-06 | 18 | 72916776  | ZADH2   | Body                | AF | yes |
| cg10197305 | 0.21 | 0.14 | 0.07 | 5.02E-07 | 4  | 125112    | ZNF718  | Body;ncRNA promoter | AF | no  |
| cg03396347 | 0.73 | 0.60 | 0.61 | 1.08E-05 | 1  | 1875803   |         |                     | AF | yes |
| cg02251754 | 0.50 | 0.29 | 0.18 | 3.50E-20 | 1  | 28572299  |         |                     | AF | yes |
| cg02193146 | 0.64 | 0.79 | 0.76 | 6.37E-06 | 1  | 110752257 |         | ncRNA promoter      | AF | no  |
| cg23915527 | 0.50 | 0.36 | 0.39 | 2.45E-05 | 1  | 161368787 |         |                     | AF | yes |
| cg21868798 | 0.36 | 0.30 | 0.24 | 3.09E-05 | 1  | 199481399 |         |                     | AF | yes |
| cg20240347 | 0.46 | 0.31 | 0.35 | 1.72E-04 | 1  | 204465584 |         |                     | AF | yes |
| cg16450677 | 0.29 | 0.17 | 0.19 | 8.75E-08 | 2  | 70312492  |         |                     | AF | yes |
| cg12391643 | 0.38 | 0.46 | 0.54 | 3.35E-05 | 2  | 85316997  |         |                     | AF | yes |
| cg22111694 | 0.70 | 0.50 | 0.44 | 1.29E-30 | 2  | 91758369  |         |                     | AF | yes |
| cg04722349 | 0.62 | 0.55 | 0.49 | 2.90E-14 | 2  | 133090251 |         |                     | AF | yes |
| cg14898223 | 0.56 | 0.43 | 0.49 | 1.17E-04 | 2  | 190447407 |         |                     | AF | no  |
| cg23555395 | 0.60 | 0.38 | 0.41 | 6.45E-22 | 2  | 238036564 |         |                     | AF | yes |
| cg16415457 | 0.56 | 0.49 | 0.44 | 3.55E-06 | 3  | 23713441  |         |                     | AF | yes |
| cg00315563 | 0.39 | 0.20 | 0.27 | 3.03E-08 | 3  | 182243039 |         |                     | AF | yes |
| cg03307177 | 0.41 | 0.52 | 0.53 | 6.08E-04 | 3  | 196347230 |         |                     | AF | yes |
| cg12367833 | 0.68 | 0.82 | 0.84 | 1.52E-12 | 4  | 42764094  |         |                     | AF | yes |
| cg16301894 | 0.77 | 0.61 | 0.68 | 1.25E-06 | 4  | 129389744 |         |                     | AF | yes |
| cg27586797 | 0.38 | 0.52 | 0.65 | 5.22E-07 | 5  | 13664584  |         |                     | AF | yes |
| cg10680621 | 0.32 | 0.25 | 0.19 | 2.62E-06 | 5  | 139069449 |         |                     | AF | no  |
| cg08951638 | 0.50 | 0.41 | 0.36 | 8.07E-06 | 5  | 141706213 |         |                     | AF | no  |
| cg19318364 | 0.64 | 0.72 | 0.80 | 4.75E-18 | 6  | 55774999  |         |                     | AF | yes |

|            |      |      |      |          |    |           |        |                |    |     |
|------------|------|------|------|----------|----|-----------|--------|----------------|----|-----|
| cg25753473 | 0.28 | 0.16 | 0.16 | 2.38E-07 | 6  | 170532835 |        |                | AF | no  |
| cg12575883 | 0.40 | 0.32 | 0.23 | 1.50E-08 | 7  | 1003710   |        |                | AF | yes |
| cg15679892 | 0.54 | 0.66 | 0.66 | 1.53E-06 | 7  | 1267057   |        |                | AF | yes |
| cg04462931 | 0.77 | 0.63 | 0.66 | 1.37E-06 | 7  | 64300061  |        |                | AF | no  |
| cg25332918 | 0.79 | 0.65 | 0.68 | 1.32E-05 | 7  | 158766061 |        |                | AF | yes |
| cg00154902 | 0.35 | 0.42 | 0.47 | 4.43E-05 | 8  | 1245703   |        |                | AF | yes |
| cg22816462 | 0.79 | 0.91 | 0.91 | 9.08E-06 | 8  | 6633067   |        |                | AF | yes |
| cg00923880 | 0.59 | 0.49 | 0.42 | 5.47E-06 | 8  | 19613178  |        |                | AF | yes |
| cg07964753 | 0.72 | 0.87 | 0.82 | 1.76E-07 | 8  | 142112622 |        |                | AF | yes |
| cg17903548 | 0.59 | 0.49 | 0.45 | 7.26E-07 | 8  | 142401534 |        |                | AF | yes |
| cg26466789 | 0.45 | 0.24 | 0.28 | 2.04E-13 | 8  | 144437314 |        |                | AF | yes |
| cg23244022 | 0.52 | 0.22 | 0.27 | 1.31E-15 | 8  | 144437350 |        |                | AF | yes |
| cg22123784 | 0.73 | 0.50 | 0.58 | 4.49E-12 | 8  | 144437507 |        |                | AF | no  |
| cg14157578 | 0.43 | 0.55 | 0.52 | 1.39E-03 | 9  | 110764967 |        |                | AF | yes |
| cg13544455 | 0.68 | 0.78 | 0.81 | 9.46E-13 | 9  | 139496083 |        | ncRNA promoter | AF | yes |
| cg25705717 | 0.27 | 0.20 | 0.12 | 1.85E-09 | 10 | 27608719  |        |                | AF | yes |
| cg06749524 | 0.30 | 0.48 | 0.51 | 8.49E-21 | 10 | 111152929 |        |                | AF | yes |
| cg16777618 | 0.58 | 0.50 | 0.45 | 5.58E-04 | 11 | 128694184 |        |                | AF | yes |
| cg05694021 | 0.56 | 0.43 | 0.48 | 2.89E-04 | 12 | 19699504  |        |                | AF | no  |
| cg25134647 | 0.74 | 0.52 | 0.50 | 1.61E-07 | 12 | 25454990  |        |                | AF | yes |
| cg00557959 | 0.61 | 0.69 | 0.75 | 3.71E-05 | 13 | 113296414 |        |                | AF | yes |
| cg13252730 | 0.50 | 0.35 | 0.40 | 4.89E-05 | 14 | 22975486  |        |                | AF | yes |
| cg17311865 | 0.47 | 0.27 | 0.35 | 1.17E-05 | 14 | 22975521  |        |                | AF | yes |
| cg05499111 | 0.52 | 0.64 | 0.70 | 5.63E-16 | 15 | 27902080  |        |                | AF | no  |
| cg25508830 | 0.43 | 0.28 | 0.31 | 5.01E-06 | 15 | 100893944 |        |                | AF | yes |
| cg04381865 | 0.83 | 0.67 | 0.73 | 1.22E-06 | 16 | 15219673  |        |                | AF | yes |
| cg04506728 | 0.74 | 0.82 | 0.87 | 7.53E-08 | 16 | 53407722  |        | ncRNA promoter | AF | no  |
| cg04042333 | 0.84 | 0.76 | 0.71 | 1.62E-04 | 17 | 1104665   |        |                | AF | no  |
| cg02352716 | 0.69 | 0.60 | 0.52 | 6.57E-09 | 17 | 1104805   |        |                | AF | yes |
| cg05200811 | 0.51 | 0.59 | 0.67 | 2.70E-08 | 21 | 47581042  |        |                | AF | yes |
| cg00147172 | 0.69 | 0.60 | 0.54 | 1.47E-07 | 22 | 46423604  |        |                | AF | no  |
| cg08979191 | 0.56 | 0.72 | 0.56 | 8.77E-07 | 5  | 132113734 | SEPT8  | Promoter       | CA | yes |
| cg24951781 | 0.54 | 0.69 | 0.57 | 3.32E-07 | 5  | 132114055 | SEPT8  | Promoter       | CA | yes |
| cg18912768 | 0.58 | 0.44 | 0.56 | 3.16E-09 | 2  | 169887819 | ABCB11 | Promoter       | CA | no  |
| cg21351392 | 0.73 | 0.59 | 0.70 | 1.63E-06 | 6  | 161607487 | AGPAT4 | Body           | CA | yes |
| cg02107279 | 0.43 | 0.29 | 0.41 | 4.55E-06 | 5  | 14870749  | ANKH   | Body           | CA | yes |
| cg13286116 | 0.61 | 0.46 | 0.55 | 1.46E-04 | 11 | 13302098  | ARNTL  | Promoter       | CA | yes |

|            |      |      |      |          |    |           |          |                         |    |     |
|------------|------|------|------|----------|----|-----------|----------|-------------------------|----|-----|
| cg07314988 | 0.70 | 0.59 | 0.78 | 7.64E-09 | 11 | 289774    | ATHL1    | Promoter;ncRNA promoter | CA | yes |
| cg10261205 | 0.85 | 0.72 | 0.89 | 1.59E-13 | 11 | 289927    | ATHL1    | Body;ncRNA promoter     | CA | yes |
| cg06556497 | 0.57 | 0.49 | 0.62 | 3.94E-04 | 18 | 76828521  | ATP9B    | Promoter                | CA | no  |
| cg14170999 | 0.75 | 0.62 | 0.75 | 6.02E-05 | 17 | 79380515  | BAHCC1   | Body                    | CA | yes |
| cg08208480 | 0.27 | 0.38 | 0.19 | 3.26E-07 | 11 | 1413093   | BRSK2    | Body                    | CA | yes |
| cg15465743 | 0.56 | 0.66 | 0.47 | 4.02E-07 | 11 | 1413145   | BRSK2    | Body                    | CA | yes |
| cg16062483 | 0.77 | 0.65 | 0.77 | 1.63E-07 | 14 | 98444417  | C14orf64 | Body                    | CA | no  |
| cg20744362 | 0.59 | 0.73 | 0.60 | 1.19E-04 | 22 | 50050164  | C22orf34 | Body                    | CA | yes |
| cg06204040 | 0.75 | 0.88 | 0.81 | 1.03E-05 | 16 | 89037481  | CBFA2T3  | Body                    | CA | yes |
| cg04850148 | 0.76 | 0.61 | 0.74 | 3.66E-06 | 17 | 34539744  | CCL4L2   | Body                    | CA | no  |
| cg04524040 | 0.49 | 0.35 | 0.44 | 1.18E-07 | 19 | 4153364   | CREB3L3  | Promoter                | CA | yes |
| cg14839256 | 0.40 | 0.26 | 0.33 | 8.37E-08 | 8  | 7332851   | DEFB104B | Promoter                | CA | no  |
| cg19400179 | 0.56 | 0.48 | 0.63 | 7.88E-07 | 3  | 108321607 | DZIP3    | Promoter                | CA | yes |
| cg25075347 | 0.46 | 0.34 | 0.47 | 1.17E-07 | 6  | 133731801 | EYA4     | Body                    | CA | yes |
| cg10833066 | 0.55 | 0.39 | 0.64 | 1.05E-16 | 12 | 111807467 | FAM109A  | Promoter;ncRNA promoter | CA | yes |
| cg16794471 | 0.62 | 0.50 | 0.59 | 3.30E-05 | 2  | 153271840 | FMNL2    | Body                    | CA | no  |
| cg07753967 | 0.33 | 0.22 | 0.35 | 6.42E-04 | 20 | 29611652  | FRG1B    | Promoter                | CA | no  |
| cg14815891 | 0.36 | 0.25 | 0.38 | 2.05E-03 | 20 | 29611903  | FRG1B    | Body                    | CA | no  |
| cg26984593 | 0.50 | 0.37 | 0.51 | 6.25E-08 | 10 | 14051636  | FRMD4A   | Body                    | CA | yes |
| cg08734931 | 0.50 | 0.37 | 0.51 | 3.05E-08 | 10 | 14051649  | FRMD4A   | Body                    | CA | yes |
| cg02284273 | 0.52 | 0.38 | 0.55 | 2.74E-07 | 10 | 14051679  | FRMD4A   | Body                    | CA | yes |
| cg03179435 | 0.34 | 0.22 | 0.35 | 4.86E-06 | 10 | 14051821  | FRMD4A   | Body                    | CA | yes |
| cg05517541 | 0.61 | 0.41 | 0.57 | 2.03E-12 | 6  | 112115209 | FYN      | Promoter                | CA | no  |
| cg26846943 | 0.69 | 0.54 | 0.67 | 2.29E-05 | 6  | 112165062 | FYN      | Promoter                | CA | no  |
| cg01190989 | 0.56 | 0.46 | 0.58 | 1.96E-06 | 4  | 22502077  | GPR125   | Body                    | CA | no  |
| cg25772418 | 0.58 | 0.40 | 0.56 | 3.71E-09 | 12 | 131519998 | GPR133   | Body;ncRNA promoter     | CA | yes |
| cg06611426 | 0.60 | 0.49 | 0.62 | 6.93E-07 | 12 | 52404161  | GRASP    | Body                    | CA | no  |
| cg22138327 | 0.21 | 0.15 | 0.28 | 1.93E-09 | 13 | 27999177  | GTF3A    | Body                    | CA | yes |
| cg26038582 | 0.69 | 0.57 | 0.64 | 1.73E-02 | 1  | 42384390  | HIVEP3   | Promoter                | CA | no  |
| cg12858166 | 0.54 | 0.75 | 0.39 | 7.97E-15 | 6  | 33033176  | HLA-DPA1 | 3'UTR                   | CA | yes |
| cg13661648 | 0.58 | 0.78 | 0.43 | 2.46E-16 | 6  | 33035284  | HLA-DPA1 | 3'UTR                   | CA | yes |
| cg17294865 | 0.57 | 0.79 | 0.55 | 8.22E-07 | 6  | 33050124  | HLA-DPA1 | Promoter                | CA | yes |
| cg15138289 | 0.45 | 0.63 | 0.45 | 1.76E-06 | 6  | 33051749  | HLA-DPB1 | Body                    | CA | yes |
| cg25057035 | 0.57 | 0.68 | 0.53 | 7.61E-10 | 6  | 33053889  | HLA-DPB1 | Body                    | CA | yes |
| cg04006133 | 0.62 | 0.47 | 0.58 | 4.09E-06 | 16 | 84172431  | HSDL1    | Promoter                | CA | no  |
| cg24426391 | 0.46 | 0.35 | 0.48 | 1.91E-08 | 11 | 20384886  | HTATIP2  | Promoter                | CA | yes |
| cg18150584 | 0.57 | 0.50 | 0.64 | 6.28E-04 | 1  | 23887816  | ID3      | Promoter                | CA | no  |

|            |      |      |      |          |    |           |                     |                      |    |     |
|------------|------|------|------|----------|----|-----------|---------------------|----------------------|----|-----|
| cg10967866 | 0.59 | 0.46 | 0.53 | 1.08E-04 | 10 | 134362164 | INPP5A              | Body                 | CA | no  |
| cg21341645 | 0.53 | 0.44 | 0.62 | 8.29E-11 | 7  | 155091523 | INSIG1              | Body                 | CA | yes |
| cg22000984 | 0.51 | 0.37 | 0.50 | 7.84E-10 | 5  | 150226278 | IRGM                | Promoter             | CA | yes |
| cg00862290 | 0.35 | 0.41 | 0.28 | 5.70E-04 | 3  | 178984973 | KCNMB3              | Promoter             | CA | yes |
| cg01017257 | 0.57 | 0.48 | 0.61 | 3.62E-05 | 1  | 15059738  | KIAA1026            | Body;Body            | CA | yes |
| cg16558994 | 0.30 | 0.21 | 0.36 | 2.37E-05 | 1  | 21023132  | KIF17               | Body                 | CA | yes |
| cg14018024 | 0.55 | 0.45 | 0.57 | 5.73E-05 | 9  | 133908909 | LAMC3               | Body                 | CA | no  |
| cg00378510 | 0.29 | 0.21 | 0.35 | 2.45E-06 | 19 | 2291020   | LINGO3              | Body                 | CA | yes |
| cg02713669 | 0.41 | 0.32 | 0.45 | 1.16E-05 | 2  | 109746691 | LOC100287216;SH3RF3 | ncRNA promoter;Body  | CA | no  |
| cg25308803 | 0.69 | 0.59 | 0.73 | 5.24E-08 | 2  | 109746735 | LOC100287216;SH3RF3 | ncRNA promoter;Body  | CA | yes |
| cg03846641 | 0.70 | 0.57 | 0.73 | 2.41E-08 | 2  | 109746751 | LOC100287216;SH3RF3 | ncRNA promoter;Body  | CA | yes |
| cg07548255 | 0.69 | 0.59 | 0.71 | 1.84E-06 | 2  | 109746754 | LOC100287216;SH3RF3 | ncRNA promoter ;Body | CA | yes |
| cg17179862 | 0.60 | 0.48 | 0.54 | 1.20E-02 | 17 | 46681362  | LOC404266;HOXB6     | Body;Promoter        | CA | no  |
| cg24610854 | 0.48 | 0.31 | 0.45 | 1.27E-08 | 5  | 130510020 | LYRM7               | Body                 | CA | yes |
| cg07737292 | 0.75 | 0.66 | 0.86 | 3.99E-07 | 16 | 56892460  | MIR138-2            | Body;ncRNA promoter  | CA | yes |
| cg17129188 | 0.67 | 0.60 | 0.72 | 2.33E-07 | 8  | 134307597 | NDRG1               | Promoter             | CA | no  |
| cg08651937 | 0.80 | 0.67 | 0.82 | 5.29E-10 | 3  | 156530506 | PA2G4P4             | Promoter             | CA | no  |
| cg24169315 | 0.65 | 0.49 | 0.65 | 1.13E-05 | 2  | 242048359 | PASK                | Body                 | CA | yes |
| cg01042202 | 0.65 | 0.57 | 0.69 | 4.36E-07 | 5  | 140242159 | PCDHA (cluster)     | Body                 | CA | yes |
| cg17165241 | 0.65 | 0.76 | 0.63 | 2.74E-05 | 11 | 400385    | PKP3                | Body                 | CA | yes |
| cg18222590 | 0.41 | 0.35 | 0.48 | 1.21E-10 | 1  | 204290972 | PLEKHA6             | Promoter             | CA | yes |
| cg17178900 | 0.28 | 0.50 | 0.24 | 2.76E-10 | 1  | 205818956 | PM20D1              | Body                 | CA | yes |
| cg26354017 | 0.31 | 0.50 | 0.28 | 1.98E-08 | 1  | 205819088 | PM20D1              | Promoter             | CA | yes |
| cg14159672 | 0.30 | 0.48 | 0.26 | 5.54E-11 | 1  | 205819179 | PM20D1              | Promoter             | CA | yes |
| cg14893161 | 0.26 | 0.38 | 0.22 | 2.00E-11 | 1  | 205819251 | PM20D1              | Promoter             | CA | yes |
| cg11965913 | 0.15 | 0.30 | 0.11 | 9.61E-14 | 1  | 205819406 | PM20D1              | Promoter             | CA | yes |
| cg24503407 | 0.25 | 0.43 | 0.21 | 1.11E-13 | 1  | 205819492 | PM20D1              | Promoter             | CA | yes |
| cg07157834 | 0.33 | 0.46 | 0.28 | 2.78E-09 | 1  | 205819609 | PM20D1              | Promoter             | CA | yes |
| cg24499605 | 0.45 | 0.32 | 0.43 | 1.76E-14 | 1  | 3142925   | PRDM16              | Body                 | CA | no  |
| cg10761639 | 0.74 | 0.84 | 0.69 | 1.09E-17 | 1  | 2023794   | PRKCZ               | Promoter             | CA | yes |
| cg11821200 | 0.54 | 0.42 | 0.51 | 2.37E-06 | 5  | 40685989  | PTGER4              | Body                 | CA | no  |
| cg18311871 | 0.51 | 0.43 | 0.59 | 2.48E-09 | 7  | 157754600 | PTPRN2              | Body                 | CA | yes |
| cg06715136 | 0.61 | 0.55 | 0.68 | 3.33E-04 | 7  | 158046025 | PTPRN2              | Body                 | CA | yes |
| cg06400119 | 0.47 | 0.38 | 0.51 | 8.89E-05 | 7  | 158046222 | PTPRN2              | Body                 | CA | yes |
| cg18112681 | 0.62 | 0.47 | 0.55 | 1.79E-06 | 11 | 63303399  | RARRES3             | Promoter             | CA | no  |
| cg10631373 | 0.41 | 0.29 | 0.36 | 2.25E-04 | 1  | 89457642  | RBMXL1;CCBL2        | Promoter;Promoter    | CA | yes |
| cg14227325 | 0.53 | 0.36 | 0.46 | 2.64E-06 | 2  | 113190197 | RGPD8               | Body                 | CA | yes |

|            |      |      |      |          |    |           |          |                         |    |     |
|------------|------|------|------|----------|----|-----------|----------|-------------------------|----|-----|
| cg05302531 | 0.50 | 0.62 | 0.55 | 1.77E-05 | 7  | 101936362 | SH2B2    | Body;ncRNA promoter     | CA | no  |
| cg10259889 | 0.56 | 0.72 | 0.63 | 8.19E-06 | 7  | 101936430 | SH2B2    | Body;ncRNA promoter     | CA | no  |
| cg05256304 | 0.33 | 0.41 | 0.29 | 1.02E-03 | 11 | 116969870 | SIK3     | Promoter;ncRNA promoter | CA | no  |
| cg19980771 | 0.30 | 0.44 | 0.32 | 4.66E-03 | 6  | 110798022 | SLC22A16 | Promoter;ncRNA promoter | CA | yes |
| cg17132030 | 0.32 | 0.24 | 0.38 | 4.23E-10 | 19 | 17599784  | SLC27A1  | Body                    | CA | yes |
| cg03258139 | 0.66 | 0.58 | 0.72 | 1.91E-06 | 9  | 2013970   | SMARCA2  | Promoter                | CA | no  |
| cg04134399 | 0.28 | 0.15 | 0.28 | 9.18E-09 | 1  | 246231142 | SMYD3    | Body                    | CA | no  |
| cg21523688 | 0.56 | 0.80 | 0.62 | 7.68E-21 | 15 | 45319037  | SORD     | Body                    | CA | yes |
| cg11861562 | 0.66 | 0.74 | 0.62 | 2.69E-05 | 11 | 117069780 | TAGLN    | Promoter                | CA | yes |
| cg16524733 | 0.49 | 0.62 | 0.48 | 2.62E-06 | 11 | 117070046 | TAGLN    | Promoter                | CA | yes |
| cg09566995 | 0.62 | 0.50 | 0.57 | 1.13E-03 | 11 | 1320634   | TOLLIP   | Body                    | CA | no  |
| cg18786374 | 0.55 | 0.46 | 0.59 | 7.68E-05 | 2  | 202313532 | TRAK2    | Promoter                | CA | no  |
| cg07144255 | 0.77 | 0.87 | 0.70 | 2.29E-10 | 2  | 3323078   | TSSC1    | Body                    | CA | yes |
| cg17205313 | 0.53 | 0.37 | 0.60 | 1.27E-11 | 18 | 21572748  | TTC39C   | Promoter                | CA | yes |
| cg12407057 | 0.81 | 0.65 | 0.85 | 2.38E-17 | 1  | 1366206   |          | ncRNA promoter          | CA | no  |
| cg10760651 | 0.48 | 0.37 | 0.50 | 1.06E-04 | 1  | 86968184  |          |                         | CA | yes |
| cg02889973 | 0.46 | 0.39 | 0.51 | 3.25E-04 | 1  | 234977572 |          |                         | CA | no  |
| cg00967073 | 0.50 | 0.43 | 0.57 | 4.64E-06 | 1  | 244443687 |          |                         | CA | no  |
| cg11807280 | 0.48 | 0.36 | 0.45 | 5.38E-07 | 2  | 66654644  |          |                         | CA | no  |
| cg22068400 | 0.27 | 0.48 | 0.27 | 7.47E-10 | 2  | 90016264  |          |                         | CA | yes |
| cg12697337 | 0.43 | 0.67 | 0.43 | 3.36E-09 | 2  | 90016302  |          |                         | CA | no  |
| cg09455823 | 0.63 | 0.51 | 0.72 | 6.10E-13 | 2  | 201606912 |          |                         | CA | yes |
| cg08439880 | 0.64 | 0.50 | 0.60 | 2.12E-06 | 3  | 133502540 |          |                         | CA | yes |
| cg04181038 | 0.27 | 0.34 | 0.22 | 1.96E-04 | 4  | 183730758 |          |                         | CA | yes |
| cg06834916 | 0.51 | 0.39 | 0.48 | 6.31E-05 | 5  | 95610     |          |                         | CA | no  |
| cg21594278 | 0.30 | 0.23 | 0.36 | 2.59E-07 | 5  | 72815513  |          |                         | CA | yes |
| cg08355045 | 0.38 | 0.26 | 0.41 | 2.29E-08 | 6  | 80787529  |          |                         | CA | yes |
| cg07095347 | 0.47 | 0.33 | 0.42 | 2.58E-06 | 6  | 133253256 |          |                         | CA | yes |
| cg07185983 | 0.49 | 0.63 | 0.42 | 3.25E-10 | 6  | 139012860 |          | ncRNA promoter          | CA | yes |
| cg15288329 | 0.54 | 0.41 | 0.53 | 2.39E-07 | 6  | 170268691 |          |                         | CA | no  |
| cg10312186 | 0.41 | 0.28 | 0.37 | 1.38E-05 | 6  | 170403583 |          |                         | CA | no  |
| cg04804717 | 0.60 | 0.51 | 0.64 | 9.79E-07 | 7  | 1300320   |          |                         | CA | no  |
| cg07234876 | 0.72 | 0.85 | 0.75 | 1.07E-04 | 8  | 600039    |          |                         | CA | yes |
| cg23336892 | 0.39 | 0.31 | 0.45 | 1.06E-08 | 10 | 57361919  |          |                         | CA | yes |
| cg09033333 | 0.51 | 0.41 | 0.56 | 5.62E-10 | 10 | 133892406 |          |                         | CA | no  |
| cg20731937 | 0.45 | 0.26 | 0.39 | 3.18E-09 | 12 | 48336164  |          |                         | CA | yes |
| cg00792968 | 0.44 | 0.36 | 0.50 | 1.69E-04 | 13 | 22635873  |          |                         | CA | yes |



|            |      |      |      |          |    |           |          |                         |    |     |
|------------|------|------|------|----------|----|-----------|----------|-------------------------|----|-----|
| cg20515423 | 0.62 | 0.50 | 0.63 | 4.72E-05 | 14 | 34385840  |          |                         | CA | no  |
| cg21484985 | 0.73 | 0.80 | 0.67 | 2.21E-03 | 14 | 70690525  |          | ncRNA promoter          | CA | yes |
| cg19865237 | 0.44 | 0.31 | 0.39 | 5.29E-04 | 14 | 104690244 |          | ncRNA promoter          | CA | yes |
| cg25228737 | 0.67 | 0.57 | 0.70 | 2.08E-11 | 15 | 82234347  |          |                         | CA | no  |
| cg08194009 | 0.40 | 0.27 | 0.36 | 3.27E-05 | 17 | 25707428  |          |                         | CA | no  |
| cg22127848 | 0.70 | 0.59 | 0.71 | 2.34E-09 | 17 | 64295986  |          |                         | CA | no  |
| cg26843498 | 0.51 | 0.42 | 0.58 | 2.24E-07 | 19 | 2361574   |          |                         | CA | yes |
| cg08931129 | 0.44 | 0.31 | 0.44 | 4.75E-05 | 20 | 29535007  |          |                         | CA | no  |
| cg00157199 | 0.54 | 0.40 | 0.51 | 9.28E-04 | 20 | 29551622  |          |                         | CA | yes |
| cg10356904 | 0.77 | 0.62 | 0.76 | 1.43E-08 | 22 | 49881777  |          |                         | CA | yes |
| cg14507445 | 0.80 | 0.66 | 0.80 | 4.27E-10 | 22 | 49886340  |          |                         | CA | yes |
| cg05729745 | 0.58 | 0.42 | 0.56 | 4.23E-06 | 22 | 49937644  |          | ncRNA promoter          | CA | yes |
| cg26279745 | 0.41 | 0.35 | 0.50 | 6.63E-06 | 14 | 24801970  | ADCY4    | Body                    | AS | no  |
| cg06758191 | 0.83 | 0.84 | 0.53 | 2.52E-21 | 4  | 7812988   | AFAP1    | Body                    | AS | yes |
| cg10645314 | 0.58 | 0.54 | 0.75 | 1.18E-07 | 2  | 3704589   | ALLC     | Promoter                | AS | yes |
| cg20090290 | 0.41 | 0.39 | 0.54 | 7.86E-07 | 11 | 46543695  | AMBRA1   | Body                    | AS | no  |
| cg21175976 | 0.35 | 0.33 | 0.46 | 6.62E-07 | 8  | 11421337  | BLK      | Body                    | AS | yes |
| cg17658113 | 0.62 | 0.57 | 0.46 | 2.87E-06 | 11 | 1413282   | BRSK2    | Body                    | AS | yes |
| cg12064373 | 0.43 | 0.40 | 0.55 | 5.47E-07 | 11 | 1457153   | BRSK2    | Body                    | AS | yes |
| cg01338139 | 0.51 | 0.49 | 0.63 | 4.42E-17 | 15 | 38987640  | C15orf53 | Promoter                | AS | yes |
| cg09033006 | 0.40 | 0.46 | 0.22 | 5.74E-19 | 1  | 244517177 | C1orf100 | Promoter                | AS | yes |
| cg06917450 | 0.29 | 0.27 | 0.54 | 2.31E-16 | 1  | 38156652  | C1orf109 | Promoter                | AS | yes |
| cg06937882 | 0.50 | 0.47 | 0.60 | 8.88E-04 | 20 | 24974362  | C20orf3  | Promoter                | AS | no  |
| cg05486191 | 0.45 | 0.40 | 0.32 | 1.72E-08 | 7  | 5937190   | C7orf28A | Promoter                | AS | no  |
| cg11070193 | 0.65 | 0.64 | 0.80 | 2.21E-06 | 1  | 26527870  | CATSPER4 | Body                    | AS | yes |
| cg20415053 | 0.54 | 0.62 | 0.74 | 1.60E-05 | 1  | 26527928  | CATSPER4 | Body                    | AS | yes |
| cg05275595 | 0.59 | 0.59 | 0.44 | 7.01E-08 | 19 | 43857874  | CD177    | Promoter                | AS | yes |
| cg02792829 | 0.54 | 0.60 | 0.42 | 6.51E-13 | 15 | 40762807  | CHST14   | Promoter                | AS | no  |
| cg01962183 | 0.51 | 0.56 | 0.65 | 2.29E-07 | 16 | 1507866   | CLCN7    | Body                    | AS | no  |
| cg04385420 | 0.73 | 0.77 | 0.63 | 1.28E-09 | 16 | 85816991  | COX4NB   | Body;ncRNA promoter     | AS | yes |
| cg19112186 | 0.77 | 0.72 | 0.65 | 6.95E-05 | 22 | 51016638  | CPT1B    | Promoter                | AS | yes |
| cg21156386 | 0.74 | 0.74 | 0.87 | 2.20E-06 | 11 | 692983    | DEAF1    | Body                    | AS | yes |
| cg02963119 | 0.33 | 0.28 | 0.41 | 2.52E-04 | 16 | 450970    | DECR2    | Promoter                | AS | no  |
| cg12014181 | 0.68 | 0.66 | 0.79 | 6.31E-05 | 10 | 729479    | DIP2C    | Body                    | AS | yes |
| cg10804726 | 0.13 | 0.16 | 0.26 | 9.14E-15 | 17 | 72270433  | DNAI2    | Promoter                | AS | yes |
| cg21181453 | 0.65 | 0.71 | 0.54 | 2.60E-08 | 9  | 130700954 | DPM2     | Promoter;ncRNA promoter | AS | yes |
| cg12807187 | 0.60 | 0.65 | 0.53 | 1.91E-05 | 3  | 71778392  | EIF4E3   | Promoter                | AS | no  |

|            |      |      |      |          |    |           |           |                     |    |     |
|------------|------|------|------|----------|----|-----------|-----------|---------------------|----|-----|
| cg13298116 | 0.29 | 0.33 | 0.19 | 2.08E-04 | 11 | 62369859  | EML3;MTA2 | 3'UTR;Promoter      | AS | no  |
| cg06737308 | 0.36 | 0.40 | 0.51 | 3.17E-06 | 4  | 185021514 | ENPP6     | Body                | AS | yes |
| cg04850659 | 0.31 | 0.26 | 0.40 | 1.05E-08 | 1  | 17019133  | ESPNP     | Body                | AS | no  |
| cg01061164 | 0.74 | 0.78 | 0.63 | 8.99E-18 | 6  | 170686343 | FAM120B   | Body                | AS | yes |
| cg22621161 | 0.70 | 0.75 | 0.84 | 2.91E-13 | 10 | 116654257 | FAM160B1  | Body                | AS | yes |
| cg12239580 | 0.53 | 0.49 | 0.62 | 1.29E-04 | 3  | 43073058  | FAM198A   | Body                | AS | yes |
| cg10157098 | 0.52 | 0.53 | 0.64 | 1.11E-05 | 7  | 128354967 | FAM71F1   | Promoter            | AS | yes |
| cg06791446 | 0.60 | 0.62 | 0.74 | 1.52E-08 | 10 | 123355268 | FGFR2     | Promoter            | AS | yes |
| cg02210151 | 0.52 | 0.54 | 0.66 | 8.64E-08 | 10 | 123356041 | FGFR2     | Promoter            | AS | yes |
| cg01493009 | 0.80 | 0.88 | 0.70 | 1.13E-15 | 13 | 41186645  | FOXO1     | Body                | AS | yes |
| cg10760299 | 0.60 | 0.58 | 0.70 | 2.56E-04 | 15 | 45669010  | GATM      | Body                | AS | no  |
| cg04879348 | 0.71 | 0.68 | 0.51 | 2.61E-30 | 2  | 109124576 | GCC2      | 3'UTR               | AS | yes |
| cg06223162 | 0.30 | 0.38 | 0.53 | 5.65E-08 | 1  | 101003688 | GPR88     | Promoter            | AS | yes |
| cg25210835 | 0.25 | 0.28 | 0.46 | 2.81E-09 | 1  | 110254828 | GSTM5     | Promoter            | AS | yes |
| cg17005068 | 0.57 | 0.54 | 0.70 | 1.44E-08 | 22 | 24384525  | GSTT1     | Promoter            | AS | yes |
| cg23914842 | 0.32 | 0.39 | 0.50 | 1.21E-07 | 1  | 9327170   | H6PD      | 3'UTR               | AS | yes |
| cg08309069 | 0.63 | 0.58 | 0.45 | 8.27E-08 | 6  | 31240651  | HLA-C     | Promoter            | AS | no  |
| cg07075026 | 0.36 | 0.44 | 0.55 | 4.35E-06 | 17 | 47091521  | IGF2BP1   | Body;ncRNA promoter | AS | yes |
| cg10950924 | 0.39 | 0.47 | 0.56 | 2.41E-07 | 17 | 47092072  | IGF2BP1   | Body;ncRNA promoter | AS | yes |
| cg18128536 | 0.47 | 0.53 | 0.62 | 1.45E-04 | 17 | 47092178  | IGF2BP1   | Body;ncRNA promoter | AS | yes |
| cg11783901 | 0.24 | 0.28 | 0.36 | 2.81E-09 | 17 | 47102000  | IGF2BP1   | Body                | AS | yes |
| cg13897122 | 0.48 | 0.45 | 0.58 | 1.43E-05 | 2  | 103039542 | IL18RAP   | Promoter            | AS | no  |
| cg15021238 | 0.48 | 0.45 | 0.57 | 1.82E-07 | 2  | 173305865 | ITGA6     | Body                | AS | no  |
| cg18346707 | 0.50 | 0.45 | 0.34 | 1.07E-07 | 2  | 231732249 | ITM2C     | Body                | AS | yes |
| cg09359103 | 0.45 | 0.41 | 0.22 | 7.67E-15 | 1  | 154839909 | KCNN3     | Body                | AS | yes |
| cg27626185 | 0.47 | 0.46 | 0.24 | 4.94E-35 | 17 | 73056755  | KCTD2     | Body                | AS | yes |
| cg18428193 | 0.64 | 0.67 | 0.76 | 7.87E-06 | 2  | 27665017  | KRTCAP3   | Promoter            | AS | no  |
| cg24768116 | 0.51 | 0.57 | 0.66 | 3.50E-06 | 2  | 27665128  | KRTCAP3   | Promoter            | AS | no  |
| cg12000995 | 0.47 | 0.54 | 0.66 | 4.83E-07 | 2  | 27665139  | KRTCAP3   | Promoter            | AS | no  |
| cg12648201 | 0.50 | 0.57 | 0.67 | 9.27E-07 | 2  | 27665141  | KRTCAP3   | Promoter            | AS | no  |
| cg21248554 | 0.51 | 0.56 | 0.67 | 5.10E-07 | 2  | 27665150  | KRTCAP3   | Promoter            | AS | yes |
| cg16393899 | 0.48 | 0.43 | 0.33 | 1.37E-04 | 6  | 5136301   | LYRM4     | Body                | AS | yes |
| cg25814293 | 0.31 | 0.36 | 0.44 | 3.70E-04 | 7  | 1883251   | MAD1L1    | Body;ncRNA promoter | AS | no  |
| cg20290983 | 0.19 | 0.16 | 0.28 | 9.26E-11 | 6  | 43655470  | MRPS18A   | Promoter            | AS | no  |
| cg00574513 | 0.44 | 0.40 | 0.53 | 4.59E-19 | 3  | 123417080 | MYLK      | Body                | AS | yes |
| cg08017634 | 0.38 | 0.33 | 0.49 | 4.47E-10 | 8  | 144659831 | NAPRT1    | Body;ncRNA promoter | AS | yes |
| cg06860422 | 0.37 | 0.43 | 0.29 | 2.22E-06 | 16 | 788079    | NARFL     | Body                | AS | no  |

|            |      |      |      |          |    |           |          |                         |    |     |
|------------|------|------|------|----------|----|-----------|----------|-------------------------|----|-----|
| cg00755546 | 0.17 | 0.23 | 0.33 | 2.55E-07 | 1  | 19971792  | NBL1     | Promoter                | AS | yes |
| cg09226051 | 0.42 | 0.40 | 0.30 | 4.03E-03 | 1  | 247611502 | NLRP3    | Body                    | AS | yes |
| cg11787167 | 0.44 | 0.36 | 0.24 | 8.11E-09 | 14 | 33407370  | NPAS3    | Promoter                | AS | yes |
| cg14654471 | 0.91 | 0.89 | 0.75 | 3.57E-14 | 1  | 5937169   | NPHP4    | Body                    | AS | yes |
| cg05348875 | 0.55 | 0.56 | 0.67 | 4.46E-06 | 2  | 206628625 | NRP2     | Body;ncRNA promoter     | AS | no  |
| cg14157435 | 0.55 | 0.58 | 0.71 | 3.42E-05 | 2  | 206628692 | NRP2     | Body;ncRNA promoter     | AS | no  |
| cg15964132 | 0.88 | 0.85 | 0.76 | 9.20E-07 | 11 | 3175636   | OSBPL5   | Promoter                | AS | yes |
| cg20511548 | 0.43 | 0.48 | 0.56 | 8.03E-06 | 11 | 3178322   | OSBPL5   | Promoter                | AS | yes |
| cg04757492 | 0.55 | 0.50 | 0.42 | 2.63E-07 | 8  | 145003862 | PLEC1    | Body                    | AS | yes |
| cg00095688 | 0.62 | 0.66 | 0.52 | 1.24E-05 | 1  | 2003864   | PRKCZ    | Promoter                | AS | no  |
| cg26689483 | 0.37 | 0.39 | 0.26 | 3.64E-05 | 4  | 17513197  | QDPR     | Body                    | AS | no  |
| cg02780029 | 0.40 | 0.38 | 0.50 | 1.80E-06 | 10 | 43622663  | RET;RET  | Body;3'UTR              | AS | yes |
| cg02673002 | 0.73 | 0.69 | 0.60 | 2.91E-06 | 11 | 74459317  | RNF169   | Promoter                | AS | yes |
| cg17766305 | 0.25 | 0.20 | 0.32 | 6.68E-05 | 10 | 90147030  | RNLS     | Body                    | AS | no  |
| cg25841625 | 0.39 | 0.34 | 0.46 | 1.17E-06 | 4  | 77119588  | SCARB2   | Body                    | AS | no  |
| cg16034991 | 0.82 | 0.83 | 0.67 | 3.55E-08 | 19 | 52146598  | SIGLEC14 | 3'UTR                   | AS | yes |
| cg09488502 | 0.46 | 0.49 | 0.35 | 1.05E-11 | 19 | 52134289  | SIGLEC5  | Promoter                | AS | yes |
| cg04798314 | 0.51 | 0.66 | 0.84 | 2.26E-13 | 1  | 246668601 | SMYD3    | Body                    | AS | yes |
| cg15293181 | 0.77 | 0.77 | 0.64 | 1.69E-12 | 2  | 1166311   | SNTG2    | Body                    | AS | yes |
| cg26924012 | 0.18 | 0.17 | 0.31 | 5.83E-23 | 15 | 45694286  | SPATA5L1 | Promoter;ncRNA promoter | AS | yes |
| cg01286930 | 0.38 | 0.41 | 0.52 | 1.61E-06 | 2  | 54783773  | SPTBN1   | Body                    | AS | yes |
| cg02927682 | 0.37 | 0.40 | 0.49 | 1.75E-03 | 1  | 54844424  | SSBP3    | Body                    | AS | yes |
| cg01996567 | 0.41 | 0.48 | 0.56 | 9.40E-05 | 7  | 149484880 | SSPO     | Body                    | AS | no  |
| cg12289045 | 0.55 | 0.53 | 0.66 | 1.26E-06 | 19 | 51141361  | SYT3     | Promoter                | AS | yes |
| cg23472400 | 0.87 | 0.82 | 0.70 | 2.87E-15 | 7  | 99704848  | TAF6     | 3'UTR                   | AS | yes |
| cg16590012 | 0.84 | 0.85 | 0.62 | 2.73E-29 | 1  | 1265354   | TAS1R3   | Promoter                | AS | yes |
| cg04995717 | 0.63 | 0.59 | 0.49 | 4.20E-05 | 9  | 27109293  | TEK      | Promoter                | AS | yes |
| cg22824376 | 0.12 | 0.17 | 0.24 | 8.22E-15 | 14 | 77648248  | TMEM63C  | Promoter                | AS | yes |
| cg03497872 | 0.62 | 0.60 | 0.38 | 1.55E-18 | 16 | 1275895   | TPSG1    | Promoter                | AS | yes |
| cg20511966 | 0.91 | 0.90 | 0.77 | 1.35E-14 | 8  | 141361266 | TRAPPC9  | Body                    | AS | yes |
| cg07973162 | 0.60 | 0.56 | 0.35 | 8.44E-17 | 4  | 69435250  | UGT2B17  | Promoter                | AS | no  |
| cg05554000 | 0.73 | 0.71 | 0.61 | 6.88E-04 | 7  | 158905015 | VIPR2    | Body                    | AS | yes |
| cg13444538 | 0.70 | 0.68 | 0.57 | 1.51E-05 | 7  | 158905317 | VIPR2    | Body                    | AS | yes |
| cg22854985 | 0.91 | 0.89 | 0.74 | 2.23E-17 | 2  | 174082101 | ZAK      | Body                    | AS | yes |
| cg12297590 | 0.64 | 0.64 | 0.76 | 1.90E-04 | 6  | 158080750 | ZDHHC14  | Body                    | AS | no  |
| cg06513375 | 0.76 | 0.77 | 0.89 | 3.52E-07 | 8  | 145955988 | ZNF251   | Body                    | AS | yes |
| cg12717203 | 0.23 | 0.17 | 0.09 | 2.29E-06 | 4  | 124342    | ZNF718   | Body;ncRNA promoter     | AS | no  |

|            |      |      |      |          |    |           |        |                     |    |     |
|------------|------|------|------|----------|----|-----------|--------|---------------------|----|-----|
| cg05388281 | 0.32 | 0.25 | 0.16 | 9.35E-08 | 4  | 125504    | ZNF718 | Body;ncRNA promoter | AS | no  |
| cg24853868 | 0.51 | 0.49 | 0.66 | 2.26E-05 | 1  | 146555624 |        |                     | AS | yes |
| cg13502125 | 0.66 | 0.63 | 0.77 | 8.15E-05 | 1  | 147826191 |        |                     | AS | yes |
| cg15829088 | 0.33 | 0.37 | 0.45 | 3.36E-04 | 1  | 247802935 |        | ncRNA promoter      | AS | yes |
| cg13700939 | 0.72 | 0.66 | 0.59 | 1.34E-06 | 2  | 128166166 |        |                     | AS | no  |
| cg23320965 | 0.77 | 0.76 | 0.64 | 6.20E-11 | 2  | 202850601 |        |                     | AS | no  |
| cg01879591 | 0.50 | 0.46 | 0.38 | 7.52E-03 | 2  | 242954430 |        |                     | AS | no  |
| cg01292810 | 0.56 | 0.62 | 0.45 | 2.14E-06 | 3  | 184241840 |        |                     | AS | yes |
| cg19775763 | 0.60 | 0.61 | 0.36 | 5.91E-11 | 3  | 194786989 |        |                     | AS | yes |
| cg18522231 | 0.24 | 0.28 | 0.51 | 3.87E-16 | 3  | 196705629 |        |                     | AS | yes |
| cg21434132 | 0.32 | 0.38 | 0.59 | 2.60E-13 | 3  | 196705742 |        |                     | AS | yes |
| cg00335715 | 0.30 | 0.26 | 0.40 | 7.14E-04 | 5  | 90575459  |        | ncRNA promoter      | AS | no  |
| cg00599530 | 0.68 | 0.68 | 0.56 | 5.08E-07 | 6  | 170589809 |        |                     | AS | no  |
| cg18217622 | 0.58 | 0.55 | 0.45 | 4.46E-06 | 6  | 170732253 |        |                     | AS | no  |
| cg07257824 | 0.50 | 0.50 | 0.35 | 5.03E-09 | 6  | 170732353 |        |                     | AS | no  |
| cg08735705 | 0.41 | 0.34 | 0.24 | 1.04E-08 | 7  | 1003645   |        |                     | AS | yes |
| cg16101574 | 0.25 | 0.24 | 0.54 | 2.56E-12 | 7  | 7291514   |        |                     | AS | yes |
| cg21634283 | 0.58 | 0.55 | 0.69 | 2.47E-04 | 7  | 57071676  |        |                     | AS | yes |
| cg14927855 | 0.72 | 0.69 | 0.58 | 2.89E-10 | 7  | 155151427 |        |                     | AS | yes |
| cg06106484 | 0.32 | 0.29 | 0.42 | 1.69E-07 | 8  | 32985289  |        |                     | AS | no  |
| cg10616319 | 0.48 | 0.41 | 0.32 | 5.89E-09 | 10 | 15468812  |        |                     | AS | yes |
| cg14957089 | 0.52 | 0.57 | 0.65 | 1.05E-04 | 11 | 331092    |        |                     | AS | no  |
| cg26881268 | 0.82 | 0.79 | 0.67 | 1.02E-11 | 11 | 94782548  |        |                     | AS | yes |
| cg12564567 | 0.35 | 0.29 | 0.46 | 2.68E-06 | 11 | 116371188 |        | ncRNA promoter      | AS | yes |
| cg22764591 | 0.11 | 0.09 | 0.22 | 5.74E-07 | 12 | 58329936  |        |                     | AS | yes |
| cg23591463 | 0.17 | 0.12 | 0.27 | 7.91E-05 | 12 | 114851495 |        |                     | AS | yes |
| cg14456004 | 0.16 | 0.20 | 0.30 | 1.31E-11 | 13 | 21872349  |        |                     | AS | yes |
| cg20293942 | 0.32 | 0.35 | 0.16 | 8.84E-08 | 13 | 50701256  |        |                     | AS | yes |
| cg16896868 | 0.67 | 0.71 | 0.84 | 1.00E-06 | 13 | 110319562 |        |                     | AS | yes |
| cg15975806 | 0.71 | 0.75 | 0.85 | 9.27E-05 | 13 | 110319607 |        |                     | AS | yes |
| cg24447866 | 0.45 | 0.49 | 0.61 | 1.57E-13 | 15 | 29034942  |        |                     | AS | yes |
| cg21520684 | 0.43 | 0.47 | 0.55 | 1.42E-09 | 15 | 29034950  |        |                     | AS | yes |
| cg08109568 | 0.61 | 0.64 | 0.80 | 1.80E-17 | 15 | 31115862  |        |                     | AS | yes |
| cg08125436 | 0.48 | 0.44 | 0.57 | 6.35E-05 | 16 | 7855305   |        |                     | AS | no  |
| cg26536949 | 0.50 | 0.58 | 0.71 | 5.61E-06 | 17 | 57053     |        |                     | AS | yes |
| cg05528899 | 0.59 | 0.63 | 0.77 | 1.27E-05 | 17 | 57120     |        |                     | AS | yes |
| cg05785424 | 0.42 | 0.35 | 0.17 | 1.80E-17 | 17 | 21226409  |        |                     | AS | yes |

|            |      |      |      |          |    |          |
|------------|------|------|------|----------|----|----------|
| cg22116458 | 0.26 | 0.20 | 0.11 | 2.10E-17 | 17 | 21226746 |
| cg07529122 | 0.44 | 0.40 | 0.30 | 1.17E-03 | 21 | 47054539 |

|    |     |
|----|-----|
| AS | yes |
| AS | yes |

**Supplemental table S2:**

51 unique pop-CpG sites overlapping with non-coding RNA promoters.

| TargetID   | Chr. | Position  | Transcript ID   | Feature   | Strand | Transcript |           |
|------------|------|-----------|-----------------|-----------|--------|------------|-----------|
|            |      |           |                 |           |        | start      | stop      |
| cg12407057 | 1    | 1366206   | ENST00000428781 | lincRNA   | -      | 1363502    | 1365635   |
| cg12407057 | 1    | 1366206   | ENST00000434150 | lincRNA   | -      | 1365930    | 1367223   |
| cg02193146 | 1    | 110752257 | ENST00000455967 | antisense | -      | 110751456  | 110752609 |
| cg15829088 | 1    | 247802935 | ENST00000435333 | antisense | -      | 247728941  | 247804156 |
| cg15829088 | 1    | 247802935 | ENST00000446347 | antisense | -      | 247729210  | 247803505 |
| cg15829088 | 1    | 247802935 | ENST00000449298 | antisense | +      | 247803051  | 247910364 |
| cg15829088 | 1    | 247802935 | ENST00000582218 | antisense | +      | 247803351  | 247827145 |
| cg02713669 | 2    | 109746691 | ENST00000567491 | lincRNA   | -      | 109743783  | 109745386 |
| cg25308803 | 2    | 109746735 | ENST00000567491 | lincRNA   | -      | 109743783  | 109745386 |
| cg03846641 | 2    | 109746751 | ENST00000567491 | lincRNA   | -      | 109743783  | 109745386 |
| cg07548255 | 2    | 109746754 | ENST00000567491 | lincRNA   | -      | 109743783  | 109745386 |
| cg05348875 | 2    | 206628625 | ENST00000423425 | antisense | -      | 206624221  | 206628730 |
| cg14157435 | 2    | 206628692 | ENST00000423425 | antisense | -      | 206624221  | 206628730 |
| cg20916523 | 3    | 10184584  | ENST00000458986 | snoRNA    | +      | 10182834   | 10182931  |
| cg12717203 | 4    | 124342    | ENST00000511079 | lincRNA   | +      | 124386     | 156177    |
| cg12717203 | 4    | 124342    | ENST00000513304 | lincRNA   | +      | 124404     | 127532    |
| cg12717203 | 4    | 124342    | ENST00000513889 | lincRNA   | +      | 124420     | 125178    |
| cg12717203 | 4    | 124342    | ENST00000510175 | lincRNA   | +      | 124420     | 157779    |
| cg10197305 | 4    | 125112    | ENST00000511079 | lincRNA   | +      | 124386     | 156177    |
| cg10197305 | 4    | 125112    | ENST00000513304 | lincRNA   | +      | 124404     | 127532    |
| cg10197305 | 4    | 125112    | ENST00000513889 | lincRNA   | +      | 124420     | 125178    |
| cg10197305 | 4    | 125112    | ENST00000510175 | lincRNA   | +      | 124420     | 157779    |
| cg05388281 | 4    | 125504    | ENST00000511079 | lincRNA   | +      | 124386     | 156177    |
| cg05388281 | 4    | 125504    | ENST00000513304 | lincRNA   | +      | 124404     | 127532    |
| cg05388281 | 4    | 125504    | ENST00000513889 | lincRNA   | +      | 124420     | 125178    |
| cg05388281 | 4    | 125504    | ENST00000510175 | lincRNA   | +      | 124420     | 157779    |
| cg00335715 | 5    | 90575459  | ENST00000440769 | lincRNA   | -      | 90575914   | 90576959  |
| cg19980771 | 6    | 110798022 | ENST00000569685 | antisense | +      | 110799110  | 110800639 |
| cg07185983 | 6    | 139012860 | ENST00000432673 | antisense | +      | 139013685  | 139018425 |
| cg25814293 | 7    | 1883251   | ENST00000428925 | antisense | -      | 1881252    | 1881812   |
| cg25814293 | 7    | 1883251   | ENST00000580817 | miRNA     | -      | 1883816    | 1883889   |
| cg16172923 | 7    | 1883390   | ENST00000428925 | antisense | -      | 1881252    | 1881812   |
| cg16172923 | 7    | 1883390   | ENST00000580817 | miRNA     | -      | 1883816    | 1883889   |
| cg16658412 | 7    | 1883420   | ENST00000428925 | antisense | -      | 1881252    | 1881812   |
| cg16658412 | 7    | 1883420   | ENST00000580817 | miRNA     | -      | 1883816    | 1883889   |
| cg05302531 | 7    | 101936362 | ENST00000581001 | miRNA     | +      | 101936369  | 101936453 |
| cg10259889 | 7    | 101936430 | ENST00000581001 | miRNA     | +      | 101936369  | 101936453 |
| cg08017634 | 8    | 144659831 | ENST00000529247 | antisense | +      | 144661806  | 144662840 |
| cg06546677 | 8    | 145537504 | ENST00000525023 | antisense | -      | 145538253  | 145538801 |
| cg21181453 | 9    | 130700954 | ENST00000588890 | antisense | +      | 130700162  | 130703122 |
| cg21181453 | 9    | 130700954 | ENST00000587978 | antisense | +      | 130700162  | 130703130 |
| cg21181453 | 9    | 130700954 | ENST00000586374 | antisense | +      | 130700192  | 130703134 |
| cg21181453 | 9    | 130700954 | ENST00000590283 | antisense | +      | 130700198  | 130703134 |
| cg21181453 | 9    | 130700954 | ENST00000587355 | antisense | +      | 130700201  | 130703134 |
| cg21181453 | 9    | 130700954 | ENST00000591408 | antisense | +      | 130700410  | 130703101 |
| cg21181453 | 9    | 130700954 | ENST00000415141 | antisense | +      | 130702015  | 130703231 |
| cg13544455 | 9    | 139496083 | ENST00000516631 | snoRNA    | +      | 139496967  | 139497062 |
| cg07314988 | 11   | 289774    | ENST00000534742 | antisense | +      | 288038     | 288987    |
| cg07314988 | 11   | 289774    | ENST00000525217 | antisense | +      | 288086     | 288978    |
| cg10261205 | 11   | 289927    | ENST00000534742 | antisense | +      | 288038     | 288987    |
| cg10261205 | 11   | 289927    | ENST00000525217 | antisense | +      | 288086     | 288978    |
| cg12564567 | 11   | 116371188 | ENST00000452629 | lincRNA   | -      | 116367616  | 116371347 |
| cg05256304 | 11   | 116969870 | ENST00000442124 | antisense | +      | 116969703  | 116978886 |

|            |    |           |                 |           |   |           |           |
|------------|----|-----------|-----------------|-----------|---|-----------|-----------|
| cg10833066 | 12 | 111807467 | ENST00000548006 | lincRNA   | + | 111807086 | 111834903 |
| cg10833066 | 12 | 111807467 | ENST00000552663 | lincRNA   | + | 111807086 | 111841114 |
| cg25772418 | 12 | 131519998 | ENST00000535370 | lincRNA   | - | 131515115 | 131520032 |
| cg06722407 | 13 | 19918586  | ENST00000413833 | lincRNA   | + | 19919189  | 19920889  |
| cg21484985 | 14 | 70690525  | ENST00000554008 | lincRNA   | + | 70690482  | 70696825  |
| cg21484985 | 14 | 70690525  | ENST00000555198 | lincRNA   | + | 70690493  | 70696898  |
| cg19865237 | 14 | 104690244 | ENST00000553757 | lincRNA   | + | 104689921 | 104754406 |
| cg19865237 | 14 | 104690244 | ENST00000556528 | lincRNA   | + | 104689931 | 104741966 |
| cg19865237 | 14 | 104690244 | ENST00000555282 | lincRNA   | + | 104689951 | 104710084 |
| cg26924012 | 15 | 45694286  | ENST00000458245 | lincRNA   | - | 45671395  | 45694525  |
| cg21667061 | 15 | 60772094  | ENST00000559824 | antisense | + | 60771377  | 60922836  |
| cg21667061 | 15 | 60772094  | ENST00000501579 | antisense | + | 60771380  | 60820823  |
| cg21667061 | 15 | 60772094  | ENST00000558235 | antisense | + | 60771406  | 60922715  |
| cg21667061 | 15 | 60772094  | ENST00000558140 | antisense | + | 60771419  | 60822088  |
| cg04506728 | 16 | 53407722  | ENST00000566383 | lincRNA   | + | 53407405  | 53418171  |
| cg07737292 | 16 | 56892460  | ENST00000384916 | miRNA     | + | 56892430  | 56892513  |
| cg04385420 | 16 | 85816991  | ENST00000516502 | snRNA     | - | 85815381  | 85815505  |
| cg06957310 | 17 | 29283870  | ENST00000442757 | antisense | - | 29283298  | 29283979  |
| cg07075026 | 17 | 47091521  | ENST00000504865 | antisense | - | 47082093  | 47091087  |
| cg10950924 | 17 | 47092072  | ENST00000504865 | antisense | - | 47082093  | 47091087  |
| cg18128536 | 17 | 47092178  | ENST00000504865 | antisense | - | 47082093  | 47091087  |
| cg11440486 | 17 | 48585216  | ENST00000502300 | lincRNA   | - | 48580773  | 48585689  |
| cg00901687 | 17 | 48585270  | ENST00000502300 | lincRNA   | - | 48580773  | 48585689  |
| cg19203115 | 18 | 29263741  | ENST00000565978 | antisense | + | 29265618  | 29266786  |
| cg07747299 | 21 | 47604052  | ENST00000415026 | antisense | + | 47604993  | 47608855  |
| cg08742575 | 21 | 47604166  | ENST00000415026 | antisense | + | 47604993  | 47608855  |
| cg12016809 | 21 | 47604291  | ENST00000415026 | antisense | + | 47604993  | 47608855  |
| cg05896524 | 21 | 47604654  | ENST00000415026 | antisense | + | 47604993  | 47608855  |
| cg05729745 | 22 | 49937644  | ENST00000581025 | miRNA     | - | 49937041  | 49937114  |

**Supplemental table S3:**

Enrichment analysis of 439 pop-CpGs for genomic context and histone occupancy .

**Genomic context**

|                         | # Features<br>pop-CpG | pop-CpG | # Features<br>450k | 450k   | Fisher Exact Test |        |            |
|-------------------------|-----------------------|---------|--------------------|--------|-------------------|--------|------------|
|                         |                       |         |                    |        | p-value           | FDR    | Odds ratio |
| Promoter (coding genes) | 141                   | 439     | 175797             | 406021 | 0.0017            | 0.0060 | 0.7418     |
| Body                    | 147                   | 439     | 134014             | 406021 | 0.8859            | 0.8859 | 1.0144     |
| Intergenic              | 114                   | 439     | 96210              | 406021 | 0.3870            | 0.5418 | 1.0959     |
| Island                  | 104                   | 439     | 138017             | 406021 | 0.0007            | 0.0049 | 0.6969     |
| Shore                   | 124                   | 439     | 97279              | 406021 | 0.1091            | 0.1909 | 1.1788     |
| Shelf                   | 36                    | 439     | 36097              | 406021 | 0.7371            | 0.8600 | 0.9223     |
| Open sea                | 175                   | 439     | 134628             | 406021 | 0.0446            | 0.1041 | 1.2022     |

**Promoter context**

| Features | # Features<br>pop-CpG | pop-CpG | # Features<br>450k | 450k   | Fisher Exact Test |        |            |
|----------|-----------------------|---------|--------------------|--------|-------------------|--------|------------|
|          |                       |         |                    |        | p-value           | FDR    | Odds ratio |
| CTCF     | 26                    | 141     | 49179              | 175797 | 0.0492            | 0.2820 | 0.66       |
| H2A.Z    | 77                    | 141     | 114339             | 175797 | 0.2386            | 0.4061 | 0.84       |
| H3k27ac  | 64                    | 141     | 92707              | 175797 | 0.3400            | 0.4061 | 0.86       |
| H3k27me3 | 50                    | 141     | 62001              | 175797 | 1.0000            | 1.0000 | 1.01       |
| H3k36me3 | 47                    | 141     | 74832              | 175797 | 0.1519            | 0.4061 | 0.78       |
| H3k4me1  | 74                    | 141     | 70976              | 175797 | 0.0705            | 0.2820 | 1.30       |
| H3k4me2  | 83                    | 141     | 118696             | 175797 | 0.3405            | 0.4061 | 0.87       |
| H3k4me3  | 81                    | 141     | 115529             | 175797 | 0.3723            | 0.4061 | 0.87       |
| H3k79me2 | 51                    | 141     | 89451              | 175797 | 0.0390            | 0.2820 | 0.71       |
| H3k9ac   | 68                    | 141     | 102662             | 175797 | 0.2226            | 0.4061 | 0.83       |
| H3k9me3  | 32                    | 141     | 33116              | 175797 | 0.3482            | 0.4061 | 1.20       |
| H4k20me1 | 59                    | 141     | 87672              | 175797 | 0.2932            | 0.4061 | 0.84       |

**Gene body context**

| Features       | # Features<br>pop-CpG | pop-CpG    | # Features<br>450k | 450k          | Fisher Exact Test |               |             |
|----------------|-----------------------|------------|--------------------|---------------|-------------------|---------------|-------------|
|                |                       |            |                    |               | p-value           | FDR           | Odds ratio  |
| <b>CTCF</b>    | <b>38</b>             | <b>147</b> | <b>20520</b>       | <b>134014</b> | <b>0.0063</b>     | <b>0.0378</b> | <b>1.69</b> |
| H2A.Z          | 44                    | 147        | 29068              | 134014        | 0.0716            | 0.2148        | 1.38        |
| H3k27ac        | 41                    | 147        | 25010              | 134014        | 0.0271            | 0.1084        | 1.49        |
| H3k27me3       | 49                    | 147        | 43570              | 134014        | 0.8683            | 0.8683        | 1.03        |
| H3k36me3       | 59                    | 147        | 59266              | 134014        | 0.5967            | 0.7518        | 0.91        |
| <b>H3k4me1</b> | <b>62</b>             | <b>147</b> | <b>35175</b>       | <b>134014</b> | <b>0.0027</b>     | <b>0.0324</b> | <b>1.61</b> |
| H3k4me2        | 51                    | 147        | 36422              | 134014        | 0.1401            | 0.2814        | 1.28        |
| H3k4me3        | 45                    | 147        | 31586              | 134014        | 0.1407            | 0.2814        | 1.30        |
| H3k79me2       | 44                    | 147        | 36068              | 134014        | 0.5355            | 0.7518        | 1.11        |
| H3k9ac         | 30                    | 147        | 25919              | 134014        | 0.7599            | 0.8290        | 1.06        |
| H3k9me3        | 30                    | 147        | 21618              | 134014        | 0.2322            | 0.3981        | 1.27        |
| H4k20me1       | 77                    | 147        | 75570              | 134014        | 0.6265            | 0.7518        | 0.93        |



**Outside transcriptional context**

| Features | # Features pop-CpG | pop-CpG | # Features 450k | 450k  | Fisher Exact Test |        |            |
|----------|--------------------|---------|-----------------|-------|-------------------|--------|------------|
|          |                    |         |                 |       | p-value           | FDR    | Odds ratio |
| CTCF     | 20                 | 114     | 15681           | 96210 | 0.7098            | 0.7098 | 1.08       |
| H2A.Z    | 37                 | 114     | 23054           | 96210 | 0.1212            | 0.3062 | 1.35       |
| H3k27ac  | 19                 | 114     | 11002           | 96210 | 0.1503            | 0.3062 | 1.46       |
| H3k27me3 | 40                 | 114     | 44130           | 96210 | 0.1645            | 0.3062 | 0.76       |
| H3k36me3 | 11                 | 114     | 12160           | 96210 | 0.4782            | 0.5581 | 0.76       |
| H3k4me1  | 32                 | 114     | 21153           | 96210 | 0.2353            | 0.3530 | 1.28       |
| H3k4me2  | 34                 | 114     | 21833           | 96210 | 0.1682            | 0.3062 | 1.31       |
| H3k4me3  | 32                 | 114     | 17876           | 96210 | 0.0517            | 0.3062 | 1.51       |
| H3k79me2 | 12                 | 114     | 8427            | 96210 | 0.5116            | 0.5581 | 1.20       |
| H3k9ac   | 25                 | 114     | 13236           | 96210 | 0.0375            | 0.3062 | 1.59       |
| H3k9me3  | 36                 | 114     | 23201           | 96210 | 0.1786            | 0.3062 | 1.31       |
| H4k20me1 | 35                 | 114     | 37253           | 96210 | 0.2725            | 0.3633 | 0.79       |

**Supplemental table S4:**

39 pop-CpG sites with outlier characteristics of local selection (ANOVA Tukey,  $p < 0.05$ ).

| Outlier | TargetID   | Chr. | Position  | Gene symbol     | Gene context | CpG context  | Population comparism (ANOVA Tukey test) |          |          |         |         |         |
|---------|------------|------|-----------|-----------------|--------------|--------------|-----------------------------------------|----------|----------|---------|---------|---------|
|         |            |      |           |                 |              |              | AF-chimp                                | CA-chimp | AS-chimp | CA-AF   | AS-AF   | AS-CA   |
| AF      | cg06957310 | 17   | 29283870  | ADAP2           | Body         |              | 1.6E-03                                 | 6.3E-01  | 9.8E-01  | 5.9E-13 | 1.1E-12 | 3.9E-01 |
| AF      | cg12016809 | 21   | 47604291  | SPATC1L         | Promoter     | Island shore | 9.0E-04                                 | 6.5E-01  | 1.0E+00  | 5.0E-06 | 5.1E-11 | 2.1E-01 |
| AF      | cg00669623 | 1    | 1655867   | CDK11B;CDK11A   | Promoter     | Island       | 9.4E-05                                 | 1.0E+00  | 9.7E-01  | 6.0E-13 | 6.0E-13 | 9.8E-01 |
| AF      | cg17099656 | 22   | 47135171  | CERK            | Promoter     |              | 3.1E-02                                 | 9.9E-01  | 1.0E+00  | 2.3E-07 | 1.6E-06 | 9.5E-01 |
| AF      | cg12856521 | 11   | 46389249  | DGKZ            | Body         | Island       | 7.0E-07                                 | 1.4E-01  | 2.2E-01  | 1.4E-08 | 3.0E-10 | 9.6E-01 |
| AF      | cg05964212 | 3    | 48936979  | SLC25A20        | Promoter     | Island shore | 1.3E-03                                 | 9.9E-01  | 5.5E-01  | 2.1E-09 | 2.5E-05 | 1.9E-01 |
| AF      | cg06712013 | 12   | 49759545  | SPATS2          | Promoter     | Island shore | 4.4E-02                                 | 1.0E+00  | 9.9E-01  | 4.4E-06 | 6.0E-05 | 8.9E-01 |
| AF      | cg23915527 | 1    | 161368787 |                 |              | Island shore | 2.5E-02                                 | 1.0E+00  | 8.8E-01  | 6.5E-07 | 3.5E-04 | 4.2E-01 |
| CA      | cg16062483 | 14   | 98444417  | C14orf64        | Body         |              | 9.9E-01                                 | 3.7E-03  | 9.6E-01  | 3.5E-08 | 9.7E-01 | 2.0E-07 |
| CA      | cg06611426 | 12   | 52404161  | GRASP           | Body         |              | 8.7E-02                                 | 4.0E-06  | 2.1E-01  | 3.2E-06 | 8.3E-01 | 2.1E-08 |
| CA      | cg24426391 | 11   | 20384886  | HTATIP2         | Promoter     | Island shore | 1.6E-01                                 | 6.4E-06  | 3.5E-01  | 6.1E-07 | 8.1E-01 | 2.5E-09 |
| CA      | cg01042202 | 5    | 140242159 | PCDHA (cluster) | Body         | Island       | 3.5E-01                                 | 5.5E-04  | 9.2E-01  | 1.1E-04 | 1.9E-01 | 3.0E-09 |
| CA      | cg17178900 | 1    | 205818956 | PM20D1          | Body         | Island       | 5.4E-01                                 | 3.2E-05  | 8.5E-01  | 1.0E-08 | 7.2E-01 | 8.9E-12 |
| CA      | cg26354017 | 1    | 205819088 | PM20D1          | Promoter     | Island       | 5.1E-01                                 | 1.5E-04  | 8.4E-01  | 5.6E-07 | 7.0E-01 | 7.1E-10 |
| CA      | cg14159672 | 1    | 205819179 | PM20D1          | Promoter     | Island       | 5.8E-01                                 | 8.9E-05  | 9.9E-01  | 5.8E-08 | 2.4E-01 | 9.1E-13 |
| CA      | cg14893161 | 1    | 205819251 | PM20D1          | Promoter     | Island shore | 1.0E+00                                 | 2.1E-02  | 5.3E-01  | 5.9E-08 | 1.4E-01 | 6.5E-13 |
| CA      | cg24503407 | 1    | 205819492 | PM20D1          | Promoter     | Island shore | 7.6E-01                                 | 4.1E-02  | 2.4E-01  | 2.4E-10 | 3.3E-01 | 6.0E-13 |
| CA      | cg19980771 | 6    | 110798022 | SLC22A16        | Promoter     | Island       | 1.1E-01                                 | 2.2E-04  | 6.7E-02  | 1.8E-03 | 9.8E-01 | 5.1E-03 |
| CA      | cg17205313 | 18   | 21572748  | TTC39C          | Promoter     |              | 3.6E-01                                 | 2.0E-05  | 9.8E-01  | 7.6E-08 | 8.3E-02 | 6.1E-13 |
| CA      | cg22127848 | 17   | 64295986  |                 |              |              | 8.8E-01                                 | 5.0E-04  | 9.9E-01  | 2.1E-08 | 7.9E-01 | 4.0E-11 |
| AS      | cg06917450 | 1    | 38156652  | C1orf109        | Promoter     | Island shore | 1.3E-01                                 | 2.8E-01  | 1.3E-09  | 8.8E-01 | 6.1E-13 | 5.9E-13 |
| AS      | cg21156386 | 11   | 692983    | DEAF1           | Body         | Island shore | 1.0E+00                                 | 1.0E+00  | 4.7E-02  | 1.0E+00 | 1.3E-06 | 6.4E-07 |
| AS      | cg06737308 | 4    | 185021514 | ENPP6           | Body         |              | 8.9E-01                                 | 4.0E-01  | 1.2E-03  | 3.9E-01 | 9.1E-08 | 2.1E-04 |
| AS      | cg17005068 | 22   | 24384525  | GSTT1           | Promoter     | Island shore | 2.4E-01                                 | 5.9E-01  | 9.2E-06  | 6.3E-01 | 1.1E-07 | 1.2E-10 |
| AS      | cg18428193 | 2    | 27665017  | KRTCAP3         | Promoter     | Island       | 1.0E+00                                 | 8.8E-01  | 2.3E-02  | 4.7E-01 | 4.2E-07 | 3.9E-04 |
| AS      | cg24768116 | 2    | 27665128  | KRTCAP3         | Promoter     | Island       | 8.1E-01                                 | 1.3E-01  | 4.3E-04  | 7.6E-02 | 3.7E-08 | 3.0E-03 |
| AS      | cg12648201 | 2    | 27665141  | KRTCAP3         | Promoter     | Island       | 3.4E-01                                 | 1.9E-02  | 8.6E-06  | 8.1E-02 | 9.7E-09 | 1.1E-03 |
| AS      | cg21248554 | 2    | 27665150  | KRTCAP3         | Promoter     | Island       | 8.9E-01                                 | 2.9E-01  | 4.6E-04  | 2.0E-01 | 6.5E-09 | 1.6E-04 |
| AS      | cg16393899 | 6    | 5136301   | LYRM4           | 3'UTR        | Island shore | 9.0E-01                                 | 4.3E-01  | 5.5E-03  | 4.2E-01 | 5.1E-06 | 3.6E-03 |
| AS      | cg08017634 | 8    | 144659831 | NAPRT1          | Body         | Island       | 1.0E+00                                 | 6.8E-01  | 2.0E-02  | 5.6E-02 | 2.8E-06 | 1.7E-12 |
| AS      | cg14654471 | 1    | 5937169   | NPHP4           | Body         | Island       | 4.6E-01                                 | 1.5E-01  | 1.5E-08  | 6.2E-01 | 6.0E-13 | 1.6E-12 |
| AS      | cg17766305 | 10   | 90147030  | RNLS            | Body         |              | 2.8E-01                                 | 9.5E-01  | 5.7E-03  | 8.9E-02 | 2.0E-02 | 1.3E-06 |
| AS      | cg26924012 | 15   | 45694286  | SPATA5L1        | Promoter     | Island shore | 1.1E-02                                 | 7.2E-02  | 6.0E-13  | 5.9E-01 | 5.9E-13 | 5.6E-13 |
| AS      | cg12289045 | 19   | 51141361  | SYT3            | Promoter     | Island shore | 1.0E+00                                 | 9.5E-01  | 4.8E-02  | 7.9E-01 | 3.7E-06 | 3.0E-08 |
| AS      | cg13444538 | 7    | 158905317 | VIPR2           | Body         | Island       | 9.7E-01                                 | 7.6E-01  | 8.6E-03  | 7.2E-01 | 1.4E-06 | 2.0E-04 |
| AS      | cg16101574 | 7    | 7291514   |                 |              |              | 1.0E+00                                 | 1.0E+00  | 3.3E-04  | 9.9E-01 | 4.0E-12 | 1.2E-12 |
| AS      | cg23591463 | 12   | 114851495 |                 |              | Island shore | 6.7E-01                                 | 1.0E+00  | 2.5E-02  | 2.9E-01 | 6.7E-03 | 4.5E-06 |
| AS      | cg00599530 | 6    | 170589809 |                 |              | Island       | 2.3E-01                                 | 1.6E-01  | 1.5E-05  | 9.8E-01 | 3.3E-07 | 2.3E-06 |
| AS      | cg01292810 | 3    | 184241840 |                 |              | Island shore | 2.0E-01                                 | 8.2E-01  | 3.3E-04  | 1.6E-01 | 4.3E-04 | 1.8E-08 |

**Supplemental table S5:**

596 genetic variations (SNPs) associated to 298 pop-CpG sites (FDR&lt;0.05).

| TargetID   | Selection frequency | FDR      | TargetID   |
|------------|---------------------|----------|------------|
| rs12105714 | 0.5003              | <0.01    | cg22111694 |
| rs2424794  | 0.3470              | <0.01    | cg00157199 |
| rs3737622  | 0.0396              | <0.01    | cg23611477 |
| rs10833312 | 0.0358              | <0.01    | cg24426391 |
| rs6794037  | 0.0318              | <0.01    | cg19775763 |
| rs2222029  | 0.0308              | <0.01    | cg22068400 |
| rs1913671  | 0.0300              | <0.01    | cg22068400 |
| rs2195078  | 0.0299              | <0.01    | cg22068400 |
| rs335115   | 0.0299              | <0.01    | cg22068400 |
| rs7571971  | 0.0298              | <0.01    | cg22068400 |
| rs10179543 | 0.0297              | <0.01    | cg22068400 |
| rs4461289  | 0.0295              | <0.01    | cg15293181 |
| rs2306676  | 0.0293              | 0.014286 | cg22068400 |
| rs6547790  | 0.0292              | 0.022222 | cg22068400 |
| rs6974     | 0.0291              | 0.022222 | cg22068400 |
| rs11047943 | 0.0289              | <0.01    | cg25134647 |
| rs3809109  | 0.0286              | <0.01    | cg07314988 |
| rs2809823  | 0.0282              | <0.01    | cg06223162 |
| rs3737717  | 0.0265              | <0.01    | cg16590012 |
| rs6938061  | 0.0260              | <0.01    | cg24796644 |
| rs498045   | 0.0257              | <0.01    | cg24851651 |
| rs3850684  | 0.0245              | <0.01    | cg06749524 |
| rs2074175  | 0.0243              | <0.01    | cg15007983 |
| rs3809109  | 0.0242              | <0.01    | cg10261205 |
| rs644534   | 0.0241              | <0.01    | cg12239580 |
| rs2074175  | 0.0233              | <0.01    | cg25234359 |
| rs17679120 | 0.0229              | <0.01    | cg06737308 |
| rs4963867  | 0.0227              | <0.01    | cg25134647 |
| rs1430410  | 0.0226              | <0.01    | cg01201279 |
| rs4890183  | 0.0225              | <0.01    | cg26536949 |
| rs2272473  | 0.0222              | <0.01    | cg04520948 |
| rs4881729  | 0.0219              | <0.01    | cg15465743 |
| rs12934778 | 0.0219              | <0.01    | cg04381865 |
| rs12370258 | 0.0218              | <0.01    | cg25772418 |
| rs268691   | 0.0217              | <0.01    | cg14150973 |
| rs1561140  | 0.0214              | <0.01    | cg07737292 |
| rs884080   | 0.0214              | <0.01    | cg10761639 |
| rs4072287  | 0.0211              | <0.01    | cg08900409 |
| rs2412322  | 0.0209              | <0.01    | cg00901687 |
| rs9366218  | 0.0204              | <0.01    | cg01061164 |
| rs12145714 | 0.0204              | <0.01    | cg20415053 |
| rs708727   | 0.0203              | <0.01    | cg14893161 |
| rs1495986  | 0.0201              | <0.01    | cg00951395 |
| rs4890183  | 0.0198              | <0.01    | cg05528899 |
| rs4881729  | 0.0197              | <0.01    | cg17658113 |
| rs7309941  | 0.0196              | <0.01    | cg23591463 |
| rs7045617  | 0.0195              | <0.01    | cg13544455 |
| rs1385331  | 0.0194              | <0.01    | cg03307177 |
| rs9464303  | 0.0193              | <0.01    | cg19318364 |
| rs5760147  | 0.0192              | <0.01    | cg17005068 |
| rs10927202 | 0.0192              | <0.01    | cg09033006 |
| rs11264091 | 0.0189              | <0.01    | cg06917450 |
| rs708727   | 0.0189              | <0.01    | cg14159672 |
| rs4881729  | 0.0189              | <0.01    | cg12064373 |
| rs708727   | 0.0188              | <0.01    | cg24503407 |

|            |        |       |            |
|------------|--------|-------|------------|
| rs9891712  | 0.0187 | <0.01 | cg08471713 |
| rs7463743  | 0.0187 | <0.01 | cg00154902 |
| rs708727   | 0.0186 | <0.01 | cg17178900 |
| rs1495986  | 0.0186 | <0.01 | cg06935979 |
| rs2809823  | 0.0186 | <0.01 | cg09408571 |
| rs9277554  | 0.0184 | <0.01 | cg25057035 |
| rs4881729  | 0.0184 | <0.01 | cg08208480 |
| rs1861420  | 0.0184 | <0.01 | cg22824376 |
| rs708727   | 0.0184 | <0.01 | cg11965913 |
| rs9508     | 0.0181 | <0.01 | cg02251754 |
| rs628265   | 0.0180 | <0.01 | cg16558994 |
| rs12145714 | 0.0180 | <0.01 | cg11070193 |
| rs9328566  | 0.0180 | <0.01 | cg21156386 |
| rs2247016  | 0.0180 | <0.01 | cg09455823 |
| rs10512598 | 0.0180 | <0.01 | cg27626185 |
| rs708727   | 0.0176 | <0.01 | cg26354017 |
| rs8133082  | 0.0173 | <0.01 | cg12016809 |
| rs11077773 | 0.0171 | <0.01 | cg27626185 |
| rs9277554  | 0.0170 | <0.01 | cg17294865 |
| rs4074794  | 0.0170 | <0.01 | cg17165241 |
| rs17192691 | 0.0170 | <0.01 | cg10804726 |
| rs3822030  | 0.0170 | <0.01 | cg22718636 |
| rs2412322  | 0.0169 | <0.01 | cg11440486 |
| rs351111   | 0.0168 | <0.01 | cg10599438 |
| rs6840580  | 0.0166 | <0.01 | cg16301894 |
| rs5769118  | 0.0166 | <0.01 | cg17099656 |
| rs11640338 | 0.0165 | <0.01 | cg02817932 |
| rs11654695 | 0.0165 | <0.01 | cg26536949 |
| rs12621987 | 0.0163 | <0.01 | cg07144255 |
| rs4082812  | 0.0162 | <0.01 | cg21523688 |
| rs7405782  | 0.0160 | <0.01 | cg22116458 |
| rs4076933  | 0.0159 | <0.01 | cg19499452 |
| rs9277554  | 0.0159 | <0.01 | cg15138289 |
| rs11122125 | 0.0159 | <0.01 | cg14654471 |
| rs7528532  | 0.0159 | <0.01 | cg09359103 |
| rs1809148  | 0.0158 | <0.01 | cg08017634 |
| rs708727   | 0.0158 | <0.01 | cg07157834 |
| rs4654274  | 0.0158 | <0.01 | cg04798314 |
| rs8133082  | 0.0157 | <0.01 | cg05896524 |
| rs8133082  | 0.0156 | <0.01 | cg08742575 |
| rs4076933  | 0.0156 | <0.01 | cg12425861 |
| rs4076933  | 0.0155 | <0.01 | cg18912855 |
| rs11692699 | 0.0155 | <0.01 | cg15544633 |
| rs2756072  | 0.0153 | <0.01 | cg00101728 |
| rs7299249  | 0.0153 | <0.01 | cg22764591 |
| rs12938802 | 0.0153 | <0.01 | cg26536949 |
| rs2503865  | 0.0152 | <0.01 | cg02780029 |
| rs12415178 | 0.0152 | <0.01 | cg25120325 |
| rs12620999 | 0.0152 | <0.01 | cg23555395 |
| rs1561325  | 0.0151 | <0.01 | cg18346707 |
| rs10993768 | 0.0151 | <0.01 | cg13458384 |
| rs7627043  | 0.0148 | <0.01 | cg19775763 |
| rs4076933  | 0.0148 | <0.01 | cg18397450 |
| rs6938061  | 0.0148 | <0.01 | cg14926196 |
| rs3213445  | 0.0147 | <0.01 | cg19112186 |
| rs9435168  | 0.0147 | <0.01 | cg23914842 |
| rs3807125  | 0.0147 | <0.01 | cg10157098 |
| rs10412065 | 0.0147 | <0.01 | cg17713488 |
| rs8133082  | 0.0146 | <0.01 | cg14789911 |

|            |        |       |            |
|------------|--------|-------|------------|
| rs4689863  | 0.0145 | <0.01 | cg06758191 |
| rs2159134  | 0.0143 | <0.01 | cg05275595 |
| rs11748    | 0.0143 | <0.01 | cg17165241 |
| rs7405782  | 0.0141 | <0.01 | cg05785424 |
| rs10264122 | 0.0141 | <0.01 | cg12575883 |
| rs2015241  | 0.0140 | <0.01 | cg14456004 |
| rs10264122 | 0.0139 | <0.01 | cg08735705 |
| rs9460122  | 0.0139 | <0.01 | cg01061164 |
| rs4985147  | 0.0139 | <0.01 | cg04381865 |
| rs3006069  | 0.0139 | <0.01 | cg02107279 |
| rs8133082  | 0.0138 | <0.01 | cg07747299 |
| rs10229556 | 0.0138 | <0.01 | cg21634283 |
| rs16861323 | 0.0138 | <0.01 | cg22854985 |
| rs12691770 | 0.0138 | <0.01 | cg04722349 |
| rs3754446  | 0.0138 | <0.01 | cg25210835 |
| rs1346268  | 0.0138 | <0.01 | cg26924012 |
| rs6058511  | 0.0137 | <0.01 | cg09796376 |
| rs2992458  | 0.0136 | <0.01 | cg13502125 |
| rs12938802 | 0.0136 | <0.01 | cg05528899 |
| rs1876432  | 0.0135 | <0.01 | cg04193820 |
| rs925151   | 0.0135 | <0.01 | cg12564567 |
| rs1008898  | 0.0135 | <0.01 | cg16101574 |
| rs999885   | 0.0135 | <0.01 | cg23472400 |
| rs10122    | 0.0134 | <0.01 | cg22764591 |
| rs1969869  | 0.0134 | <0.01 | cg24853868 |
| rs1445688  | 0.0133 | <0.01 | cg27586797 |
| rs8133082  | 0.0133 | <0.01 | cg05200811 |
| rs8133082  | 0.0133 | <0.01 | cg13126279 |
| rs4774580  | 0.0133 | <0.01 | cg26924012 |
| rs2074824  | 0.0133 | <0.01 | cg24169315 |
| rs9549244  | 0.0133 | <0.01 | cg01493009 |
| rs9769506  | 0.0131 | <0.01 | cg21341645 |
| rs2420936  | 0.0131 | <0.01 | cg06791446 |
| rs2403583  | 0.0131 | <0.01 | cg24426391 |
| rs1038125  | 0.0131 | <0.01 | cg13375589 |
| rs4907727  | 0.0130 | <0.01 | cg00557959 |
| rs7297186  | 0.0129 | <0.01 | cg10833066 |
| rs2163645  | 0.0129 | <0.01 | cg12391643 |
| rs6558406  | 0.0129 | <0.01 | cg04757492 |
| rs3827011  | 0.0129 | <0.01 | cg17132030 |
| rs7497062  | 0.0128 | <0.01 | cg01338139 |
| rs13241427 | 0.0128 | <0.01 | cg15679892 |
| rs7406009  | 0.0127 | <0.01 | cg22116458 |
| rs6573939  | 0.0127 | <0.01 | cg21484985 |
| rs9316484  | 0.0127 | <0.01 | cg20293942 |
| rs4750090  | 0.0127 | <0.01 | cg09219688 |
| rs1876432  | 0.0125 | <0.01 | cg08896939 |
| rs7549324  | 0.0124 | <0.01 | cg14654471 |
| rs12873208 | 0.0124 | <0.01 | cg00792968 |
| rs7202817  | 0.0124 | <0.01 | cg06103394 |
| rs11847295 | 0.0124 | 0.05  | cg12425861 |
| rs4735895  | 0.0124 | <0.01 | cg07234876 |
| rs11654695 | 0.0123 | <0.01 | cg05528899 |
| rs2955221  | 0.0123 | <0.01 | cg06513375 |
| rs1131293  | 0.0122 | <0.01 | cg24169315 |
| rs3789504  | 0.0122 | <0.01 | cg13549940 |
| rs11847295 | 0.0122 | <0.01 | cg19499452 |
| rs1973265  | 0.0121 | <0.01 | cg03307177 |
| rs6481162  | 0.0121 | <0.01 | cg23336892 |

|            |        |          |            |
|------------|--------|----------|------------|
| rs4283986  | 0.0121 | <0.01    | cg10157098 |
| rs2598422  | 0.0120 | <0.01    | cg02678768 |
| rs4481540  | 0.0120 | <0.01    | cg05554000 |
| rs12790950 | 0.0120 | <0.01    | cg21156386 |
| rs4874164  | 0.0120 | <0.01    | cg08017634 |
| rs1861739  | 0.0120 | <0.01    | cg17099656 |
| rs12735611 | 0.0119 | <0.01    | cg04798314 |
| rs1531554  | 0.0119 | <0.01    | cg14170999 |
| rs1128889  | 0.0119 | <0.01    | cg02678768 |
| rs7714584  | 0.0119 | <0.01    | cg22000984 |
| rs2108485  | 0.0119 | <0.01    | cg24169315 |
| rs1876432  | 0.0118 | <0.01    | cg06957310 |
| rs6858295  | 0.0118 | <0.01    | cg04181038 |
| rs2159192  | 0.0117 | <0.01    | cg16101574 |
| rs2839133  | 0.0117 | <0.01    | cg05200811 |
| rs10924763 | 0.0116 | <0.01    | cg04798314 |
| rs3765103  | 0.0116 | <0.01    | cg25114630 |
| rs2242566  | 0.0116 | 0.05     | cg10261205 |
| rs2912089  | 0.0116 | <0.01    | cg22816462 |
| rs10272099 | 0.0116 | <0.01    | cg12575883 |
| rs6594018  | 0.0115 | <0.01    | cg20240347 |
| rs8009922  | 0.0115 | <0.01    | cg11787167 |
| rs7778301  | 0.0115 | <0.01    | cg16101574 |
| rs11166972 | 0.0115 | <0.01    | cg20511966 |
| rs7942486  | 0.0115 | <0.01    | cg13286116 |
| rs6585735  | 0.0115 | <0.01    | cg06791446 |
| rs4521710  | 0.0115 | <0.01    | cg06715136 |
| rs4977203  | 0.0113 | <0.01    | cg06546677 |
| rs2314664  | 0.0113 | <0.01    | cg15007983 |
| rs3811207  | 0.0112 | <0.01    | cg17311865 |
| rs2395309  | 0.0112 | <0.01    | cg13661648 |
| rs2420936  | 0.0112 | <0.01    | cg02210151 |
| rs556759   | 0.0112 | <0.01    | cg24851651 |
| rs10936997 | 0.0112 | <0.01    | cg00862290 |
| rs10272099 | 0.0112 | <0.01    | cg08735705 |
| rs6787114  | 0.0112 | <0.01    | cg19775763 |
| rs2395309  | 0.0112 | <0.01    | cg12858166 |
| rs2839133  | 0.0112 | <0.01    | cg11766577 |
| rs1054645  | 0.0112 | <0.01    | cg03497872 |
| rs4874159  | 0.0112 | <0.01    | cg08017634 |
| rs5770594  | 0.0111 | <0.01    | cg10356904 |
| rs9671295  | 0.0111 | 0.033333 | cg19499452 |
| rs2071904  | 0.0111 | <0.01    | cg05729745 |
| rs7573861  | 0.0111 | <0.01    | cg07144255 |
| rs4984988  | 0.0111 | <0.01    | cg27084952 |
| rs12541647 | 0.0111 | <0.01    | cg08017634 |
| rs2450772  | 0.0111 | <0.01    | cg23244022 |
| rs1088475  | 0.0110 | <0.01    | cg08109568 |
| rs332311   | 0.0110 | <0.01    | cg16896868 |
| rs3811207  | 0.0109 | <0.01    | cg13252730 |
| rs2272588  | 0.0109 | <0.01    | cg18872420 |
| rs8559     | 0.0109 | <0.01    | cg02251754 |
| rs2071904  | 0.0108 | <0.01    | cg10356904 |
| rs3913632  | 0.0108 | <0.01    | cg06749524 |
| rs4129789  | 0.0108 | <0.01    | cg06204040 |
| rs790929   | 0.0108 | <0.01    | cg20293942 |
| rs2160591  | 0.0108 | <0.01    | cg25345738 |
| rs4729568  | 0.0108 | 0.033333 | cg23472400 |
| rs4481540  | 0.0107 | <0.01    | cg13444538 |

|            |        |       |            |
|------------|--------|-------|------------|
| rs6570261  | 0.0107 | <0.01 | cg07185983 |
| rs7406009  | 0.0107 | <0.01 | cg05785424 |
| rs399867   | 0.0107 | <0.01 | cg13444538 |
| rs2030201  | 0.0107 | <0.01 | cg04722349 |
| rs1474480  | 0.0106 | <0.01 | cg07314988 |
| rs7101776  | 0.0106 | <0.01 | cg11132204 |
| rs30523    | 0.0106 | <0.01 | cg24951781 |
| rs8040604  | 0.0106 | <0.01 | cg24447866 |
| rs13008857 | 0.0105 | <0.01 | cg22681709 |
| rs3077     | 0.0105 | <0.01 | cg12858166 |
| rs6819770  | 0.0105 | <0.01 | cg06737308 |
| rs1544800  | 0.0105 | <0.01 | cg27084952 |
| rs7249727  | 0.0105 | <0.01 | cg26843498 |
| rs2774084  | 0.0105 | <0.01 | cg15975806 |
| rs2180311  | 0.0105 | <0.01 | cg03396347 |
| rs6504593  | 0.0105 | <0.01 | cg11783901 |
| rs13380040 | 0.0104 | <0.01 | cg25508830 |
| rs1004420  | 0.0104 | <0.01 | cg14781242 |
| rs4916596  | 0.0104 | <0.01 | cg21434132 |
| rs2936523  | 0.0104 | <0.01 | cg22816462 |
| rs738469   | 0.0104 | <0.01 | cg24424889 |
| rs11167024 | 0.0104 | <0.01 | cg07964753 |
| rs768659   | 0.0103 | <0.01 | cg06917450 |
| rs8048084  | 0.0103 | <0.01 | cg06103394 |
| rs7768422  | 0.0103 | <0.01 | cg19980771 |
| rs2170810  | 0.0103 | <0.01 | cg17311865 |
| rs11196967 | 0.0102 | <0.01 | cg22621161 |
| rs1466681  | 0.0102 | <0.01 | cg27626185 |
| rs8076012  | 0.0102 | <0.01 | cg11783901 |
| rs6058522  | 0.0102 | <0.01 | cg09796376 |
| rs735480   | 0.0102 | <0.01 | cg21523688 |
| rs1874249  | 0.0102 | <0.01 | cg01338139 |
| rs2839133  | 0.0102 | <0.01 | cg13126279 |
| rs7503709  | 0.0101 | <0.01 | cg22116458 |
| rs5770594  | 0.0101 | <0.01 | cg05729745 |
| rs6717729  | 0.0101 | <0.01 | cg15544633 |
| rs4076700  | 0.0101 | <0.01 | cg17765387 |
| rs10477291 | 0.0101 | <0.01 | cg11609571 |
| rs3847691  | 0.0101 | <0.01 | cg25772418 |
| rs3961919  | 0.0100 | <0.01 | cg14227325 |
| rs16967029 | 0.0100 | <0.01 | cg08896939 |
| rs10256972 | 0.0100 | <0.01 | cg08735705 |
| rs4676237  | 0.0100 | <0.01 | cg25308803 |
| rs5770594  | 0.0099 | <0.01 | cg14507445 |
| rs906528   | 0.0099 | <0.01 | cg26881268 |
| rs9277535  | 0.0099 | <0.01 | cg25057035 |
| rs7387252  | 0.0098 | <0.01 | cg18929511 |
| rs2314664  | 0.0098 | <0.01 | cg25234359 |
| rs10208384 | 0.0098 | <0.01 | cg10645314 |
| rs10235911 | 0.0098 | <0.01 | cg06715136 |
| rs2774084  | 0.0098 | <0.01 | cg16896868 |
| rs10256972 | 0.0098 | <0.01 | cg12575883 |
| rs2912091  | 0.0098 | <0.01 | cg22816462 |
| rs7557391  | 0.0098 | <0.01 | cg12391643 |
| rs2074158  | 0.0097 | <0.01 | cg20291162 |
| rs3077     | 0.0097 | <0.01 | cg13661648 |
| rs12482934 | 0.0097 | <0.01 | cg05896524 |
| rs8768     | 0.0097 | <0.01 | cg11070193 |
| rs10900579 | 0.0097 | <0.01 | cg18222590 |

|            |        |       |            |
|------------|--------|-------|------------|
| rs8768     | 0.0097 | <0.01 | cg20415053 |
| rs4916596  | 0.0097 | <0.01 | cg18522231 |
| rs16967029 | 0.0097 | <0.01 | cg04193820 |
| rs4073925  | 0.0096 | <0.01 | cg11146691 |
| rs1997762  | 0.0096 | <0.01 | cg01017257 |
| rs7986407  | 0.0096 | <0.01 | cg01493009 |
| rs2839133  | 0.0096 | <0.01 | cg14789911 |
| rs70165    | 0.0095 | <0.01 | cg22824376 |
| rs9838704  | 0.0095 | <0.01 | cg01292810 |
| rs1015390  | 0.0095 | <0.01 | cg20731937 |
| rs4676237  | 0.0095 | <0.01 | cg03846641 |
| rs11746515 | 0.0095 | <0.01 | cg27586797 |
| rs9330294  | 0.0095 | <0.01 | cg23915527 |
| rs4819138  | 0.0095 | <0.01 | cg07529122 |
| rs4845681  | 0.0094 | <0.01 | cg09359103 |
| rs10861768 | 0.0094 | <0.01 | cg25345738 |
| rs2160591  | 0.0094 | <0.01 | cg00632811 |
| rs2474460  | 0.0093 | <0.01 | cg03396347 |
| rs6585735  | 0.0093 | <0.01 | cg02210151 |
| rs522207   | 0.0093 | <0.01 | cg21434132 |
| rs11892316 | 0.0093 | <0.01 | cg12391643 |
| rs719094   | 0.0093 | 0.025 | cg22116458 |
| rs7503709  | 0.0093 | <0.01 | cg05785424 |
| rs629081   | 0.0093 | <0.01 | cg02750262 |
| rs12548656 | 0.0092 | <0.01 | cg20511966 |
| rs17133461 | 0.0092 | <0.01 | cg02673002 |
| rs10151755 | 0.0092 | <0.01 | cg11787167 |
| rs971891   | 0.0092 | <0.01 | cg24610854 |
| rs9844652  | 0.0092 | <0.01 | cg19478698 |
| rs30514    | 0.0092 | <0.01 | cg24951781 |
| rs6697423  | 0.0092 | <0.01 | cg02251754 |
| rs2838970  | 0.0092 | <0.01 | cg07529122 |
| rs11674275 | 0.0092 | <0.01 | cg03846641 |
| rs8587     | 0.0091 | <0.01 | cg04385420 |
| rs17740650 | 0.0091 | <0.01 | cg09488502 |
| rs4961331  | 0.0091 | <0.01 | cg07964753 |
| rs332311   | 0.0091 | <0.01 | cg15975806 |
| rs17740650 | 0.0090 | <0.01 | cg16034991 |
| rs11724804 | 0.0090 | <0.01 | cg22718636 |
| rs2074158  | 0.0090 | <0.01 | cg02228675 |
| rs2071904  | 0.0090 | <0.01 | cg14507445 |
| rs1853782  | 0.0090 | <0.01 | cg24853868 |
| rs12940226 | 0.0090 | <0.01 | cg10804726 |
| rs7911727  | 0.0090 | <0.01 | cg02210151 |
| rs2074546  | 0.0090 | <0.01 | cg26843498 |
| rs522207   | 0.0090 | <0.01 | cg18522231 |
| rs16824489 | 0.0089 | <0.01 | cg16558994 |
| rs9937517  | 0.0089 | <0.01 | cg27084952 |
| rs7566263  | 0.0089 | <0.01 | cg16450677 |
| rs6845     | 0.0089 | <0.01 | cg04520948 |
| rs7099565  | 0.0089 | <0.01 | cg22621161 |
| rs9674544  | 0.0089 | <0.01 | cg10950924 |
| rs7898821  | 0.0089 | <0.01 | cg12014181 |
| rs12449695 | 0.0089 | <0.01 | cg13375589 |
| rs11770823 | 0.0088 | <0.01 | cg25332918 |
| rs2701859  | 0.0088 | <0.01 | cg01493009 |
| rs1524878  | 0.0088 | <0.01 | cg08109568 |
| rs12122100 | 0.0088 | <0.01 | cg24853868 |
| rs11167028 | 0.0088 | <0.01 | cg07964753 |



|            |        |          |            |
|------------|--------|----------|------------|
| rs262683   | 0.0087 | <0.01    | cg10761639 |
| rs6832992  | 0.0087 | <0.01    | cg12367833 |
| rs7507907  | 0.0087 | <0.01    | cg27284398 |
| rs2729577  | 0.0087 | <0.01    | cg27084952 |
| rs7928630  | 0.0087 | <0.01    | cg20511548 |
| rs2734791  | 0.0087 | <0.01    | cg12575883 |
| rs212787   | 0.0087 | <0.01    | cg25075347 |
| rs10967719 | 0.0087 | <0.01    | cg04995717 |
| rs3769164  | 0.0087 | <0.01    | cg22854985 |
| rs8133082  | 0.0086 | <0.01    | cg11766577 |
| rs9900686  | 0.0086 | <0.01    | cg06957310 |
| rs9321669  | 0.0086 | <0.01    | cg07185983 |
| rs3129586  | 0.0086 | <0.01    | cg04798314 |
| rs1321685  | 0.0086 | <0.01    | cg10760651 |
| rs4985976  | 0.0086 | 0.05     | cg05785424 |
| rs6478803  | 0.0086 | <0.01    | cg21181453 |
| rs2287807  | 0.0086 | <0.01    | cg17713488 |
| rs4521710  | 0.0085 | <0.01    | cg06400119 |
| rs4676237  | 0.0085 | <0.01    | cg07548255 |
| rs4951407  | 0.0085 | <0.01    | cg20240347 |
| rs11674275 | 0.0085 | <0.01    | cg25308803 |
| rs11132224 | 0.0085 | <0.01    | cg06737308 |
| rs2450772  | 0.0085 | <0.01    | cg26466789 |
| rs2071904  | 0.0085 | <0.01    | cg20744362 |
| rs4808652  | 0.0084 | <0.01    | cg17132030 |
| rs9297145  | 0.0084 | 0.033333 | cg23472400 |
| rs4801882  | 0.0084 | <0.01    | cg09488502 |
| rs2170810  | 0.0084 | <0.01    | cg13252730 |
| rs1017943  | 0.0084 | <0.01    | cg26466789 |
| rs1949783  | 0.0084 | 0.05     | cg15679892 |
| rs6509933  | 0.0084 | <0.01    | cg10218876 |
| rs929069   | 0.0084 | <0.01    | cg27084952 |
| rs11674275 | 0.0084 | <0.01    | cg07548255 |
| rs8040604  | 0.0084 | <0.01    | cg21520684 |
| rs589927   | 0.0083 | <0.01    | cg06917450 |
| rs820335   | 0.0083 | <0.01    | cg00574513 |
| rs17748862 | 0.0083 | <0.01    | cg25705717 |
| rs301164   | 0.0082 | <0.01    | cg04385420 |
| rs1868031  | 0.0082 | <0.01    | cg19318364 |
| rs7214921  | 0.0082 | <0.01    | cg02228675 |
| rs2172349  | 0.0082 | <0.01    | cg00923880 |
| rs4451728  | 0.0082 | 0.05     | cg11132204 |
| rs4370914  | 0.0082 | <0.01    | cg20511548 |
| rs13585    | 0.0082 | <0.01    | cg18190219 |
| rs7954957  | 0.0081 | 0.033333 | cg22764591 |
| rs5770594  | 0.0081 | <0.01    | cg20744362 |
| rs31874    | 0.0081 | <0.01    | cg01042202 |
| rs6794945  | 0.0081 | <0.01    | cg08439880 |
| rs10919703 | 0.0081 | <0.01    | cg21868798 |
| rs1017943  | 0.0081 | <0.01    | cg23244022 |
| rs6458011  | 0.0081 | <0.01    | cg24796644 |
| rs4916511  | 0.0081 | <0.01    | cg03307177 |
| rs10906566 | 0.0080 | <0.01    | cg02284273 |
| rs2030048  | 0.0080 | <0.01    | cg06223162 |
| rs13079695 | 0.0080 | <0.01    | cg00315563 |
| rs888064   | 0.0080 | <0.01    | cg22824376 |
| rs17236986 | 0.0080 | <0.01    | cg00315563 |
| rs16979053 | 0.0080 | <0.01    | cg12016809 |
| rs4237786  | 0.0080 | <0.01    | cg15964132 |

|            |        |          |            |
|------------|--------|----------|------------|
| rs4909289  | 0.0080 | <0.01    | cg06715136 |
| rs10908445 | 0.0079 | <0.01    | cg09359103 |
| rs13223383 | 0.0079 | <0.01    | cg14927855 |
| rs918542   | 0.0079 | <0.01    | cg17713488 |
| rs873785   | 0.0079 | 0.033333 | cg22718636 |
| rs4944950  | 0.0079 | <0.01    | cg02673002 |
| rs2505952  | 0.0079 | <0.01    | cg08355045 |
| rs7859     | 0.0079 | <0.01    | cg21181453 |
| rs4597375  | 0.0079 | <0.01    | cg13375589 |
| rs11755081 | 0.0079 | <0.01    | cg01061164 |
| rs7586635  | 0.0079 | 0.025    | cg15544633 |
| rs2613843  | 0.0079 | 0.05     | cg14150973 |
| rs7633133  | 0.0079 | <0.01    | cg12235788 |
| rs8138399  | 0.0078 | <0.01    | cg14507445 |
| rs12595568 | 0.0078 | <0.01    | cg01338139 |
| rs2516835  | 0.0078 | 0.025    | cg15544633 |
| rs10000869 | 0.0078 | <0.01    | cg26741686 |
| rs7441245  | 0.0078 | <0.01    | cg16301894 |
| rs4979619  | 0.0078 | <0.01    | cg14157578 |
| rs9448881  | 0.0078 | <0.01    | cg08355045 |
| rs2074639  | 0.0077 | <0.01    | cg10599438 |
| rs12463408 | 0.0077 | 0.033333 | cg14227325 |
| rs2428684  | 0.0077 | <0.01    | cg11440486 |
| rs4243839  | 0.0077 | <0.01    | cg06715136 |
| rs30514    | 0.0077 | <0.01    | cg08979191 |
| rs2061690  | 0.0077 | <0.01    | cg09359103 |
| rs591567   | 0.0077 | <0.01    | cg06917450 |
| rs11653662 | 0.0077 | <0.01    | cg14170999 |
| rs10861768 | 0.0077 | <0.01    | cg00632811 |
| rs12446849 | 0.0077 | <0.01    | cg27084952 |
| rs9323533  | 0.0077 | <0.01    | cg21484985 |
| rs4985155  | 0.0076 | 0.033333 | cg04381865 |
| rs10508471 | 0.0076 | <0.01    | cg03179435 |
| rs1409150  | 0.0076 | <0.01    | cg10631373 |
| rs12872335 | 0.0076 | 0.02     | cg20293942 |
| rs16861266 | 0.0076 | <0.01    | cg22854985 |
| rs12565738 | 0.0076 | <0.01    | cg09226051 |
| rs9900686  | 0.0076 | <0.01    | cg08896939 |
| rs7010142  | 0.0076 | <0.01    | cg20511966 |
| rs9323529  | 0.0076 | <0.01    | cg21088438 |
| rs8138399  | 0.0076 | <0.01    | cg10356904 |
| rs3803792  | 0.0076 | <0.01    | cg10804726 |
| rs2340518  | 0.0075 | <0.01    | cg08896939 |
| rs16979053 | 0.0075 | 0.025    | cg05896524 |
| rs6665593  | 0.0075 | <0.01    | cg10761639 |
| rs4845397  | 0.0075 | <0.01    | cg09359103 |
| rs1865108  | 0.0075 | <0.01    | cg05275595 |
| rs11695974 | 0.0075 | 0.033333 | cg14227325 |
| rs4237786  | 0.0074 | <0.01    | cg20511548 |
| rs10787548 | 0.0074 | 0.033333 | cg22621161 |
| rs7248982  | 0.0074 | 0.033333 | cg27284398 |
| rs16979053 | 0.0074 | <0.01    | cg07747299 |
| rs8138399  | 0.0074 | <0.01    | cg05729745 |
| rs4906423  | 0.0074 | <0.01    | cg19865237 |
| rs7230037  | 0.0073 | <0.01    | cg02750262 |
| rs787583   | 0.0073 | <0.01    | cg02750262 |
| rs4648808  | 0.0073 | 0.016667 | cg10761639 |
| rs10906566 | 0.0072 | <0.01    | cg08734931 |
| rs9277535  | 0.0072 | <0.01    | cg17294865 |

|            |        |          |            |
|------------|--------|----------|------------|
| rs6121318  | 0.0072 | 0.05     | cg09796376 |
| rs2839133  | 0.0072 | 0.025    | cg05896524 |
| rs509016   | 0.0072 | <0.01    | cg18522231 |
| rs4756763  | 0.0071 | <0.01    | cg13286116 |
| rs10804876 | 0.0071 | <0.01    | cg00862290 |
| rs4862103  | 0.0071 | <0.01    | cg04181038 |
| rs10910030 | 0.0071 | 0.016667 | cg10761639 |
| rs242602   | 0.0071 | 0.05     | cg09796376 |
| rs10906566 | 0.0071 | <0.01    | cg26984593 |
| rs7174744  | 0.0071 | 0.033333 | cg08109568 |
| rs7556371  | 0.0071 | <0.01    | cg20240347 |
| rs706612   | 0.0070 | 0.02     | cg20293942 |
| rs2459994  | 0.0070 | 0.016667 | cg10761639 |
| rs2685477  | 0.0070 | <0.01    | cg06749524 |
| rs4896387  | 0.0070 | <0.01    | cg07185983 |
| rs6504593  | 0.0070 | <0.01    | cg18128536 |
| rs4605582  | 0.0070 | <0.01    | cg03307177 |
| rs855436   | 0.0069 | <0.01    | cg22410499 |
| rs4845396  | 0.0069 | 0.016667 | cg09359103 |
| rs3800268  | 0.0069 | 0.025    | cg01061164 |
| rs2025700  | 0.0069 | 0.02     | cg20293942 |
| rs12747565 | 0.0069 | <0.01    | cg15829088 |
| rs4896381  | 0.0069 | <0.01    | cg07185983 |
| rs4938349  | 0.0069 | <0.01    | cg11861562 |
| rs13079919 | 0.0069 | 0.033333 | cg00315563 |
| rs3793371  | 0.0069 | 0.04     | cg08017634 |
| rs2288519  | 0.0068 | <0.01    | cg24699670 |
| rs6778111  | 0.0068 | <0.01    | cg12235788 |
| rs2245979  | 0.0068 | 0.033333 | cg11070193 |
| rs7251424  | 0.0068 | <0.01    | cg00378510 |
| rs6862469  | 0.0068 | <0.01    | cg27586797 |
| rs3802354  | 0.0068 | <0.01    | cg21181453 |
| rs7553195  | 0.0068 | 0.028571 | cg09359103 |
| rs4801882  | 0.0068 | <0.01    | cg16034991 |
| rs4984719  | 0.0068 | <0.01    | cg27084952 |
| rs3803892  | 0.0068 | 0.033333 | cg27284398 |
| rs12022413 | 0.0068 | 0.025    | cg24853868 |
| rs11773068 | 0.0068 | <0.01    | cg18311871 |
| rs1456721  | 0.0067 | <0.01    | cg19400179 |
| rs9769826  | 0.0067 | <0.01    | cg21341645 |
| rs2301220  | 0.0067 | <0.01    | cg13661648 |
| rs6453008  | 0.0067 | <0.01    | cg21594278 |
| rs2378113  | 0.0067 | <0.01    | cg04879348 |
| rs6509931  | 0.0067 | <0.01    | cg24699670 |
| rs3128342  | 0.0067 | 0.044444 | cg10761639 |
| rs2285769  | 0.0067 | <0.01    | cg06758191 |
| rs6998229  | 0.0067 | <0.01    | cg00154902 |
| rs12939237 | 0.0067 | <0.01    | cg18128536 |
| rs4768699  | 0.0066 | <0.01    | cg11146691 |
| rs4938349  | 0.0066 | <0.01    | cg16524733 |
| rs8138399  | 0.0066 | <0.01    | cg20744362 |
| rs10497466 | 0.0066 | <0.01    | cg22681709 |
| rs11804831 | 0.0066 | 0.044444 | cg10761639 |
| rs4636972  | 0.0066 | <0.01    | cg02352716 |
| rs4262947  | 0.0066 | <0.01    | cg27084952 |
| rs4130296  | 0.0066 | <0.01    | cg17765387 |
| rs9341802  | 0.0066 | <0.01    | cg08355045 |
| rs2178403  | 0.0066 | 0.033333 | cg04520948 |
| rs1492888  | 0.0066 | <0.01    | cg11146691 |

|            |        |          |            |
|------------|--------|----------|------------|
| rs13390931 | 0.0065 | 0.04     | cg14227325 |
| rs2936817  | 0.0065 | <0.01    | cg12239580 |
| rs8076012  | 0.0065 | <0.01    | cg18128536 |
| rs6696861  | 0.0065 | 0.033333 | cg13549940 |
| rs968660   | 0.0065 | <0.01    | cg21594278 |
| rs6810830  | 0.0065 | <0.01    | cg06737308 |
| rs4854150  | 0.0065 | <0.01    | cg07144255 |
| rs13197494 | 0.0065 | <0.01    | cg21351392 |
| rs1039750  | 0.0065 | 0.033333 | cg26881268 |
| rs10059011 | 0.0065 | <0.01    | cg22000984 |
| rs3901254  | 0.0065 | <0.01    | cg24796644 |
| rs2460002  | 0.0064 | 0.044444 | cg10761639 |
| rs9277535  | 0.0064 | <0.01    | cg15138289 |
| rs3117222  | 0.0064 | <0.01    | cg17294865 |
| rs12500107 | 0.0064 | <0.01    | cg26741686 |
| rs12616127 | 0.0064 | 0.044444 | cg15544633 |
| rs757322   | 0.0064 | <0.01    | cg26843498 |
| rs89975    | 0.0064 | <0.01    | cg07234876 |
| rs6553399  | 0.0064 | <0.01    | cg15948536 |
| rs17799348 | 0.0064 | <0.01    | cg21175976 |
| rs3819495  | 0.0064 | 0.05     | cg26466789 |
| rs6459830  | 0.0064 | <0.01    | cg06400119 |
| rs6756248  | 0.0063 | 0.044444 | cg15544633 |
| rs3734110  | 0.0063 | <0.01    | cg27586797 |
| rs6446628  | 0.0063 | <0.01    | cg06758191 |
| rs16979053 | 0.0063 | 0.033333 | cg11766577 |
| rs2290416  | 0.0063 | 0.05     | cg08017634 |
| rs9512681  | 0.0063 | <0.01    | cg22138327 |
| rs7703551  | 0.0063 | 0.033333 | cg21594278 |
| rs7743193  | 0.0063 | <0.01    | cg00101728 |
| rs10949703 | 0.0063 | <0.01    | cg06715136 |
| rs4983582  | 0.0063 | <0.01    | cg19865237 |
| rs11204553 | 0.0063 | <0.01    | cg15829088 |
| rs10280773 | 0.0063 | <0.01    | cg16101574 |
| rs4527124  | 0.0063 | <0.01    | cg19283806 |
| rs2064478  | 0.0062 | <0.01    | cg17294865 |
| rs10906566 | 0.0062 | <0.01    | cg03179435 |
| rs9679602  | 0.0062 | 0.044444 | cg15544633 |
| rs624177   | 0.0062 | 0.05     | cg07075026 |
| rs710587   | 0.0062 | <0.01    | cg15260248 |
| rs3117222  | 0.0062 | <0.01    | cg25057035 |
| rs11644122 | 0.0062 | <0.01    | cg02817932 |
| rs11874608 | 0.0062 | <0.01    | cg17205313 |
| rs3736008  | 0.0062 | 0.05     | cg26466789 |
| rs710590   | 0.0062 | <0.01    | cg15260248 |
| rs738809   | 0.0062 | <0.01    | cg17005068 |
| rs916719   | 0.0062 | 0.05     | cg19980771 |
| rs4438439  | 0.0062 | <0.01    | cg21248554 |
| rs7465330  | 0.0062 | <0.01    | cg17903548 |
| rs2039890  | 0.0062 | 0.033333 | cg19865237 |
| rs6714365  | 0.0062 | <0.01    | cg18346707 |
| rs2055249  | 0.0062 | <0.01    | cg24426391 |
| rs3128917  | 0.0062 | <0.01    | cg15138289 |
| rs12473335 | 0.0061 | 0.044444 | cg15544633 |
| rs6572493  | 0.0061 | <0.01    | cg17311865 |
| rs11894434 | 0.0061 | 0.033333 | cg04722349 |
| rs4760673  | 0.0061 | <0.01    | cg20731937 |
| rs2168741  | 0.0061 | 0.05     | cg06749524 |
| rs11121648 | 0.0061 | 0.033333 | cg14654471 |

|            |        |          |            |
|------------|--------|----------|------------|
| rs4455199  | 0.0061 | <0.01    | cg01286930 |
| rs2143368  | 0.0061 | 0.033333 | cg13549940 |
| rs1911728  | 0.0061 | 0.025    | cg22824376 |
| rs7605559  | 0.0061 | 0.05     | cg04879348 |
| rs16979053 | 0.0061 | <0.01    | cg14789911 |
| rs3752372  | 0.0060 | 0.016667 | cg06715136 |
| rs6509933  | 0.0060 | <0.01    | cg24699670 |
| rs3796093  | 0.0060 | 0.05     | cg24169315 |
| rs11021024 | 0.0060 | 0.033333 | cg26881268 |
| rs6807584  | 0.0060 | <0.01    | cg16415457 |
| rs9821320  | 0.0060 | 0.033333 | cg12239580 |
| rs10513151 | 0.0060 | <0.01    | cg27586797 |
| rs11898012 | 0.0060 | <0.01    | cg01286930 |
| rs6697414  | 0.0059 | <0.01    | cg02927682 |
| rs3117222  | 0.0059 | <0.01    | cg15138289 |
| rs8076012  | 0.0059 | 0.05     | cg07075026 |
| rs7935587  | 0.0059 | <0.01    | cg24426391 |
| rs10925085 | 0.0059 | <0.01    | cg15829088 |
| rs3117230  | 0.0059 | <0.01    | cg17294865 |
| rs12970631 | 0.0059 | <0.01    | cg26848442 |
| rs937725   | 0.0059 | 0.044444 | cg15544633 |
| rs7605443  | 0.0059 | 0.04     | cg14227325 |
| rs11881836 | 0.0059 | 0.05     | cg04524040 |
| rs7328594  | 0.0058 | 0.05     | cg01493009 |
| rs6773354  | 0.0058 | 0.05     | cg08439880 |
| rs10508471 | 0.0058 | <0.01    | cg26984593 |
| rs6504593  | 0.0058 | 0.05     | cg07075026 |
| rs16945640 | 0.0058 | 0.05     | cg07075026 |
| rs271178   | 0.0057 | <0.01    | cg07095347 |
| rs10235911 | 0.0057 | 0.033333 | cg06400119 |
| rs1431399  | 0.0057 | <0.01    | cg13661648 |
| rs17091325 | 0.0056 | <0.01    | cg00923880 |
| rs7423759  | 0.0056 | 0.05     | cg15544633 |
| rs1373942  | 0.0056 | <0.01    | cg27586797 |
| rs11167042 | 0.0056 | <0.01    | cg17903548 |
| rs659366   | 0.0056 | 0.033333 | cg02673002 |
| rs10508471 | 0.0055 | <0.01    | cg02284273 |
| rs6458011  | 0.0055 | <0.01    | cg14926196 |
| rs3770011  | 0.0055 | 0.033333 | cg22681709 |
| rs3128917  | 0.0055 | <0.01    | cg25057035 |
| rs6661767  | 0.0055 | 0.05     | cg01017257 |
| rs7312159  | 0.0055 | <0.01    | cg23433370 |
| rs10414149 | 0.0055 | 0.05     | cg12289045 |
| rs7522389  | 0.0055 | <0.01    | cg00755546 |
| rs10802415 | 0.0055 | <0.01    | cg04798314 |
| rs744266   | 0.0054 | <0.01    | cg25345738 |
| rs493925   | 0.0054 | <0.01    | cg00810292 |
| rs683936   | 0.0054 | <0.01    | cg16558994 |
| rs7918550  | 0.0054 | <0.01    | cg06791446 |
| rs6572493  | 0.0054 | <0.01    | cg13252730 |
| rs673985   | 0.0054 | <0.01    | cg14157578 |
| rs6714237  | 0.0054 | 0.033333 | cg23555395 |
| rs838695   | 0.0054 | <0.01    | cg15260248 |
| rs239563   | 0.0054 | <0.01    | cg08355045 |
| rs12698186 | 0.0054 | 0.025    | cg06715136 |
| rs9277937  | 0.0054 | <0.01    | cg25057035 |
| rs12191707 | 0.0053 | <0.01    | cg07185983 |
| rs7911727  | 0.0053 | <0.01    | cg06791446 |
| rs8110283  | 0.0053 | 0.05     | cg04524040 |

|            |        |          |            |
|------------|--------|----------|------------|
| rs11723068 | 0.0053 | 0.025    | cg06758191 |
| rs2301220  | 0.0053 | <0.01    | cg12858166 |
| rs10875469 | 0.0053 | <0.01    | cg17903548 |
| rs900145   | 0.0053 | <0.01    | cg13286116 |
| rs10415880 | 0.0053 | 0.05     | cg12289045 |
| rs6859484  | 0.0053 | <0.01    | cg27586797 |
| rs687326   | 0.0053 | <0.01    | cg16777618 |
| rs6600234  | 0.0053 | 0.044444 | cg27084952 |
| rs3128917  | 0.0053 | 0.016667 | cg17294865 |
| rs7576705  | 0.0053 | 0.033333 | cg23555395 |
| rs2190935  | 0.0052 | <0.01    | cg16101574 |
| rs256235   | 0.0052 | 0.025    | cg24951781 |
| rs1010800  | 0.0052 | 0.033333 | cg17205313 |
| rs1218801  | 0.0052 | <0.01    | cg22138327 |
| rs1013406  | 0.0052 | <0.01    | cg10616319 |
| rs10508471 | 0.0051 | <0.01    | cg08734931 |
| rs7564722  | 0.0051 | 0.05     | cg22681709 |
| rs1877686  | 0.0051 | <0.01    | cg10804726 |
| rs3828761  | 0.0051 | <0.01    | cg08355045 |
| rs17452608 | 0.0050 | 0.025    | cg11787167 |
| rs11216781 | 0.0050 | 0.033333 | cg16524733 |
| rs11596719 | 0.0050 | <0.01    | cg03179435 |
| rs10244830 | 0.0050 | 0.025    | cg06715136 |
| rs10796290 | 0.0050 | 0.033333 | cg10616319 |
| rs2697153  | 0.0050 | <0.01    | cg20916523 |
| rs803054   | 0.0050 | 0.025    | cg24951781 |
| rs610719   | 0.0050 | 0.016667 | cg16558994 |
| rs4895536  | 0.0049 | 0.033333 | cg07185983 |
| rs1431399  | 0.0049 | 0.025    | cg12858166 |
| rs6597115  | 0.0049 | <0.01    | cg16393899 |
| rs12058761 | 0.0049 | 0.05     | cg26354017 |
| rs927578   | 0.0049 | 0.033333 | cg22138327 |
| rs12265500 | 0.0048 | <0.01    | cg06008345 |
| rs12042868 | 0.0048 | 0.016667 | cg16558994 |
| rs9277546  | 0.0048 | <0.01    | cg25057035 |
| rs12026838 | 0.0048 | 0.033333 | cg04798314 |
| rs3811988  | 0.0048 | <0.01    | cg22000984 |
| rs7535952  | 0.0048 | <0.01    | cg00755546 |
| rs7724558  | 0.0048 | <0.01    | cg22000984 |
| rs4562927  | 0.0048 | 0.033333 | cg17765387 |
| rs9769506  | 0.0047 | 0.05     | cg14927855 |
| rs464921   | 0.0047 | 0.025    | cg17294865 |
| rs1105207  | 0.0047 | <0.01    | cg06737308 |
| rs10788184 | 0.0047 | 0.02     | cg06791446 |
| rs4938354  | 0.0047 | 0.033333 | cg16524733 |
| rs1416836  | 0.0047 | <0.01    | cg14157578 |
| rs4239439  | 0.0047 | 0.033333 | cg17205313 |
| rs4508039  | 0.0046 | <0.01    | cg00755546 |
| rs12882789 | 0.0046 | 0.025    | cg11787167 |
| rs11596719 | 0.0045 | 0.033333 | cg08734931 |
| rs4961381  | 0.0044 | 0.05     | cg17903548 |
| rs3919526  | 0.0044 | 0.033333 | cg16101574 |
| rs2281389  | 0.0044 | 0.025    | cg17294865 |
| rs195413   | 0.0044 | 0.025    | cg24796644 |
| rs11596590 | 0.0044 | 0.033333 | cg10616319 |
| rs9616329  | 0.0044 | 0.025    | cg10356904 |
| rs4938354  | 0.0043 | 0.05     | cg11861562 |
| rs12728802 | 0.0043 | 0.016667 | cg16558994 |
| rs13223383 | 0.0042 | <0.01    | cg21341645 |

|            |        |          |            |
|------------|--------|----------|------------|
| rs739236   | 0.0042 | 0.04     | cg10356904 |
| rs4958847  | 0.0041 | <0.01    | cg22000984 |
| rs6960962  | 0.0041 | 0.042857 | cg16101574 |
| rs3758803  | 0.0040 | 0.04     | cg24426391 |
| rs4554200  | 0.0039 | 0.016667 | cg22000984 |
| rs10788184 | 0.0039 | 0.05     | cg02210151 |
| rs10119193 | 0.0039 | 0.04     | cg14157578 |
| rs10512367 | 0.0038 | 0.04     | cg14157578 |

**Supplemental table S6:**

79 unique SNPs overlapping with gene exons.

| SNP        | Chr. | Position  | Gene symbol   | Exon ID         | Start     | End       |
|------------|------|-----------|---------------|-----------------|-----------|-----------|
| rs11121648 | 1    | 5923788   | NPHP4         | ENSE00001821466 | 5922871   | 5924093   |
| rs11121648 | 1    | 5923788   | NPHP4         | ENSE00001232767 | 5922871   | 5926518   |
| rs610719   | 1    | 21020128  | RP5-930J4.5   | ENSE00001778613 | 21020076  | 21020224  |
| rs8768     | 1    | 26497340  | ZNF593        | ENSE00000955851 | 26497066  | 26498551  |
| rs8768     | 1    | 26497340  | ZNF593        | ENSE00001668894 | 26496909  | 26498551  |
| rs8559     | 1    | 28564252  | ATPIF1        | ENSE00001876539 | 28562872  | 28564609  |
| rs9508     | 1    | 28564279  | ATPIF1        | ENSE00001918899 | 28564272  | 28564616  |
| rs9508     | 1    | 28564279  | ATPIF1        | ENSE00001876539 | 28562872  | 28564609  |
| rs1409150  | 1    | 89473175  | GBP3          | ENSE00002583738 | 89472349  | 89473535  |
| rs1409150  | 1    | 89473175  | GBP3          | ENSE00002628791 | 89472362  | 89473535  |
| rs1409150  | 1    | 89473175  | GBP3          | ENSE00001941852 | 89472363  | 89473535  |
| rs1409150  | 1    | 89473175  | GBP3          | ENSE00002615493 | 89472953  | 89473535  |
| rs2809823  | 1    | 101003762 | GPR88         | ENSE00001258674 | 101003693 | 101004058 |
| rs2030048  | 1    | 101006577 | GPR88         | ENSE00001451884 | 101004450 | 101007574 |
| rs4845397  | 1    | 154832304 | KCNN3         | ENSE00001798524 | 154832171 | 154832319 |
| rs2061690  | 1    | 154919080 | PBXIP1        | ENSE00001073606 | 154918048 | 154919279 |
| rs2061690  | 1    | 154919080 | PBXIP1        | ENSE00001073606 | 154918048 | 154919279 |
| rs2061690  | 1    | 154919080 | PBXIP1        | ENSE00001447181 | 154918455 | 154919279 |
| rs2061690  | 1    | 154919080 | PBXIP1        | ENSE00001073606 | 154918048 | 154919279 |
| rs2061690  | 1    | 154919080 | PBXIP1        | ENSE00001073606 | 154918048 | 154919279 |
| rs708727   | 1    | 205767885 | SLC41A1       | ENSE00002829050 | 205767797 | 205767943 |
| rs708727   | 1    | 205767885 | SLC41A1       | ENSE00002748365 | 205767797 | 205767943 |
| rs3129586  | 1    | 246687586 | RP11-690C23.2 | ENSE00001705461 | 246687499 | 246687589 |
| rs10925085 | 1    | 247752161 | OR2G2         | ENSE00001280164 | 247751662 | 247752615 |
| rs7571971  | 2    | 88895351  | EIF2AK3       | ENSE00001735965 | 88895269  | 88895375  |
| rs6974     | 2    | 89050126  | RPIA          | ENSE00001182788 | 89049498  | 89050427  |
| rs2516835  | 2    | 99779131  | LIPT1         | ENSE00001834512 | 99778420  | 99779620  |
| rs2516835  | 2    | 99779131  | LIPT1         | ENSE00001797528 | 99778420  | 99779174  |
| rs2516835  | 2    | 99779131  | LIPT1         | ENSE00001816494 | 99778420  | 99779611  |
| rs2516835  | 2    | 99779131  | LIPT1         | ENSE00001816494 | 99778420  | 99779611  |
| rs2516835  | 2    | 99779131  | LIPT1         | ENSE00001816494 | 99778420  | 99779611  |
| rs2516835  | 2    | 99779131  | LIPT1         | ENSE00001816494 | 99778420  | 99779611  |
| rs2516835  | 2    | 99779131  | LIPT1         | ENSE00001816494 | 99778420  | 99779611  |
| rs2378113  | 2    | 109066424 | GCC2          | ENSE00001873384 | 109066089 | 109066475 |
| rs2378113  | 2    | 109066424 | GCC2          | ENSE00001578065 | 109066340 | 109066450 |
| rs2108485  | 2    | 242021742 | SNED1         | ENSE00002914804 | 242021692 | 242021779 |
| rs2108485  | 2    | 242021742 | SNED1         | ENSE00002914804 | 242021692 | 242021779 |
| rs2108485  | 2    | 242021742 | SNED1         | ENSE00002802756 | 242021692 | 242021779 |
| rs2108485  | 2    | 242021742 | SNED1         | ENSE00002914804 | 242021692 | 242021779 |
| rs3796093  | 2    | 242039198 | MTERFD2       | ENSE00000827773 | 242038811 | 242039309 |
| rs3796093  | 2    | 242039198 | MTERFD2       | ENSE00000827773 | 242038811 | 242039309 |
| rs3796093  | 2    | 242039198 | MTERFD2       | ENSE00000827773 | 242038811 | 242039309 |
| rs3796093  | 2    | 242039198 | MTERFD2       | ENSE00000827773 | 242038811 | 242039309 |
| rs3796093  | 2    | 242039198 | MTERFD2       | ENSE00000827773 | 242038811 | 242039309 |
| rs3796093  | 2    | 242039198 | MTERFD2       | ENSE00000827773 | 242038811 | 242039309 |
| rs3796093  | 2    | 242039198 | MTERFD2       | ENSE00001952923 | 242038583 | 242039309 |
| rs3796093  | 2    | 242039198 | MTERFD2       | ENSE00001662814 | 242038814 | 242039309 |
| rs1131293  | 2    | 242046785 | PASK          | ENSE00002884488 | 242046768 | 242046914 |
| rs1131293  | 2    | 242046785 | PASK          | ENSE00002960509 | 242046768 | 242046914 |
| rs1131293  | 2    | 242046785 | PASK          | ENSE00002884488 | 242046768 | 242046914 |
| rs1131293  | 2    | 242046785 | PASK          | ENSE00002884488 | 242046768 | 242046914 |
| rs1131293  | 2    | 242046785 | PASK          | ENSE00002884488 | 242046768 | 242046914 |
| rs1131293  | 2    | 242046785 | PASK          | ENSE00002884488 | 242046768 | 242046914 |
| rs2074824  | 2    | 242051777 | PASK          | ENSE00000827778 | 242051655 | 242051854 |
| rs2074824  | 2    | 242051777 | PASK          | ENSE00000827778 | 242051655 | 242051854 |
| rs2074824  | 2    | 242051777 | PASK          | ENSE00000827778 | 242051655 | 242051854 |





|            |    |           |               |                 |           |           |
|------------|----|-----------|---------------|-----------------|-----------|-----------|
| rs2450772  | 8  | 144413416 | TOP1MT        | ENSE00002845712 | 144413394 | 144413509 |
| rs2450772  | 8  | 144413416 | TOP1MT        | ENSE00002835394 | 144413394 | 144413509 |
| rs2290416  | 8  | 144657600 | NAPRT1        | ENSE00002740298 | 144657593 | 144657695 |
| rs2290416  | 8  | 144657600 | NAPRT1        | ENSE00002765179 | 144657593 | 144657695 |
| rs2290416  | 8  | 144657600 | NAPRT1        | ENSE00002765179 | 144657593 | 144657695 |
| rs2290416  | 8  | 144657600 | NAPRT1        | ENSE00002740298 | 144657593 | 144657695 |
| rs2290416  | 8  | 144657600 | NAPRT1        | ENSE00002765179 | 144657593 | 144657695 |
| rs2290416  | 8  | 144657600 | NAPRT1        | ENSE00002765179 | 144657593 | 144657695 |
| rs2290416  | 8  | 144657600 | NAPRT1        | ENSE00002765179 | 144657593 | 144657695 |
| rs3793371  | 8  | 144664299 | EEF1D         | ENSE00002147609 | 144663224 | 144666421 |
| rs4874164  | 8  | 144675048 | EEF1D         | ENSE00002156570 | 144674885 | 144675063 |
| rs4874164  | 8  | 144675048 | EEF1D         | ENSE00002178577 | 144674885 | 144675112 |
| rs4874164  | 8  | 144675048 | EEF1D         | ENSE00002178577 | 144674885 | 144675112 |
| rs4874164  | 8  | 144675048 | EEF1D         | ENSE00002140608 | 144674817 | 144675112 |
| rs4874164  | 8  | 144675048 | EEF1D         | ENSE00002158534 | 144674817 | 144675063 |
| rs4874164  | 8  | 144675048 | EEF1D         | ENSE00002158534 | 144674817 | 144675063 |
| rs4874164  | 8  | 144675048 | EEF1D         | ENSE00002158534 | 144674817 | 144675063 |
| rs4874164  | 8  | 144675048 | EEF1D         | ENSE00002158534 | 144674817 | 144675063 |
| rs4874164  | 8  | 144675048 | EEF1D         | ENSE00002144104 | 144674824 | 144675063 |
| rs6558406  | 8  | 144992103 | PLEC          | ENSE00001244232 | 144989321 | 144996563 |
| rs6558406  | 8  | 144992103 | PLEC          | ENSE00001244232 | 144989321 | 144996563 |
| rs6558406  | 8  | 144992103 | PLEC          | ENSE00001244232 | 144989321 | 144996563 |
| rs6558406  | 8  | 144992103 | PLEC          | ENSE00001244232 | 144989321 | 144996563 |
| rs6558406  | 8  | 144992103 | PLEC          | ENSE00001244232 | 144989321 | 144996563 |
| rs6558406  | 8  | 144992103 | PLEC          | ENSE00001244232 | 144989321 | 144996563 |
| rs6558406  | 8  | 144992103 | PLEC          | ENSE00001244232 | 144989321 | 144996563 |
| rs6558406  | 8  | 144992103 | PLEC          | ENSE00001244232 | 144989321 | 144996563 |
| rs6558406  | 8  | 144992103 | PLEC          | ENSE00002158741 | 144990345 | 144996563 |
| rs10119193 | 9  | 110296686 | RP11-438P9.1  | ENSE00001650754 | 110296671 | 110296962 |
| rs7859     | 9  | 130703565 | FAM102A       | ENSE00001180911 | 130702858 | 130705516 |
| rs7859     | 9  | 130703565 | FAM102A       | ENSE00001896704 | 130703160 | 130706963 |
| rs7859     | 9  | 130703565 | FAM102A       | ENSE00001948083 | 130703160 | 130705516 |
| rs7859     | 9  | 130703565 | FAM102A       | ENSE00001850360 | 130703160 | 130704017 |
| rs7859     | 9  | 130703565 | FAM102A       | ENSE00001811902 | 130703162 | 130705516 |
| rs6478803  | 9  | 130703789 | FAM102A       | ENSE00001180911 | 130702858 | 130705516 |
| rs6478803  | 9  | 130703789 | FAM102A       | ENSE00001896704 | 130703160 | 130706963 |
| rs6478803  | 9  | 130703789 | FAM102A       | ENSE00001948083 | 130703160 | 130705516 |
| rs6478803  | 9  | 130703789 | FAM102A       | ENSE00001850360 | 130703160 | 130704017 |
| rs6478803  | 9  | 130703789 | FAM102A       | ENSE00001811902 | 130703162 | 130705516 |
| rs4750090  | 10 | 11789382  | ECHDC3        | ENSE00002846921 | 11789348  | 11789469  |
| rs4750090  | 10 | 11789382  | ECHDC3        | ENSE00002876216 | 11789348  | 11789469  |
| rs4750090  | 10 | 11789382  | ECHDC3        | ENSE00002846921 | 11789348  | 11789469  |
| rs4750090  | 10 | 11789382  | ECHDC3        | ENSE00001761547 | 11789274  | 11789469  |
| rs7099565  | 10 | 116719543 | TRUB1         | ENSE00001097026 | 116719485 | 116719566 |
| rs7099565  | 10 | 116719543 | TRUB1         | ENSE00001946012 | 116719485 | 116719759 |
| rs2242566  | 11 | 295876    | ATHL1         | ENSE00002159295 | 294556    | 296107    |
| rs11748    | 11 | 403980    | PKP3          | ENSE00001308715 | 403943    | 404135    |
| rs4074794  | 11 | 409815    | SIGIRR        | ENSE00002179724 | 409466    | 410027    |
| rs2055249  | 11 | 20397723  | HTATIP2       | ENSE00002196905 | 20397563  | 20398263  |
| rs11216781 | 11 | 118012310 | SCN4B         | ENSE00002162246 | 118011922 | 118012579 |
| rs10122    | 12 | 58350631  | XRCC6BP1      | ENSE00001107587 | 58350470  | 58351052  |
| rs10122    | 12 | 58350631  | XRCC6BP1      | ENSE00002423561 | 58350470  | 58350673  |
| rs10122    | 12 | 58350631  | XRCC6BP1      | ENSE00002406173 | 58350470  | 58350723  |
| rs4076700  | 12 | 117383320 | FBXW8         | ENSE00000835049 | 117383169 | 117383333 |
| rs4076700  | 12 | 117383320 | FBXW8         | ENSE00000835049 | 117383169 | 117383333 |
| rs4076700  | 12 | 117383320 | FBXW8         | ENSE00000835049 | 117383169 | 117383333 |
| rs2170810  | 14 | 22972742  | TRAJ37        | ENSE00001508129 | 22972735  | 22972797  |
| rs9323533  | 14 | 70690877  | RP11-486O13.2 | ENSE00002533112 | 70690724  | 70690914  |
| rs11847295 | 14 | 105779305 | BRF1          | ENSE00002372990 | 105766783 | 105781926 |

|            |    |           |               |                 |           |           |
|------------|----|-----------|---------------|-----------------|-----------|-----------|
| rs4076933  | 14 | 105848891 | PACS2         | ENSE00002775837 | 105848814 | 105848918 |
| rs4076933  | 14 | 105848891 | PACS2         | ENSE00002775837 | 105848814 | 105848918 |
| rs4076933  | 14 | 105848891 | PACS2         | ENSE00002775837 | 105848814 | 105848918 |
| rs4076933  | 14 | 105848891 | PACS2         | ENSE00002775837 | 105848814 | 105848918 |
| rs4076933  | 14 | 105848891 | PACS2         | ENSE00002878211 | 105848814 | 105848918 |
| rs4076933  | 14 | 105848891 | PACS2         | ENSE00002878211 | 105848814 | 105848918 |
| rs4076933  | 14 | 105848891 | PACS2         | ENSE00002775837 | 105848814 | 105848918 |
| rs12595568 | 15 | 38990803  | C15orf53      | ENSE00001219749 | 38990339  | 38992239  |
| rs4262947  | 16 | 950922    | LA16c-306A4.2 | ENSE00002599765 | 950520    | 952578    |
| rs1054645  | 16 | 1270162   | CACNA1H       | ENSE00002630254 | 1269981   | 1271768   |
| rs1054645  | 16 | 1270162   | CACNA1H       | ENSE00002613592 | 1269981   | 1271084   |
| rs1054645  | 16 | 1270162   | CACNA1H       | ENSE00002613592 | 1269981   | 1271084   |
| rs1054645  | 16 | 1270162   | CACNA1H       | ENSE00002613592 | 1269981   | 1271084   |
| rs1054645  | 16 | 1270162   | CACNA1H       | ENSE00002613592 | 1269981   | 1271084   |
| rs1054645  | 16 | 1270162   | CACNA1H       | ENSE00002617538 | 1269981   | 1271765   |
| rs1054645  | 16 | 1270162   | CACNA1H       | ENSE00001493467 | 1269981   | 1271771   |
| rs8587     | 16 | 85813231  | EMC8          | ENSE00002849512 | 85812230  | 85813473  |
| rs8587     | 16 | 85813231  | EMC8          | ENSE00002768705 | 85812230  | 85813473  |
| rs12449695 | 17 | 4495740   | SMTNL2        | ENSE00002833218 | 4495656   | 4495743   |
| rs12449695 | 17 | 4495740   | SMTNL2        | ENSE00002813055 | 4495656   | 4495743   |
| rs12449695 | 17 | 4495740   | SMTNL2        | ENSE00002674303 | 4495650   | 4495743   |
| rs7406009  | 17 | 21436581  | C17orf51      | ENSE00002295897 | 21431571  | 21438799  |
| rs7406009  | 17 | 21436581  | C17orf51      | ENSE00001671380 | 21435738  | 21437832  |
| rs7406009  | 17 | 21436581  | C17orf51      | ENSE00001875421 | 21435876  | 21437282  |
| rs2074158  | 17 | 40257163  | DHX58         | ENSE00002830371 | 40257036  | 40257185  |
| rs2074158  | 17 | 40257163  | DHX58         | ENSE00002790578 | 40257036  | 40257185  |
| rs2074158  | 17 | 40257163  | DHX58         | ENSE00002790578 | 40257036  | 40257185  |
| rs6504593  | 17 | 47132819  | IGF2BP1       | ENSE00001218472 | 47126714  | 47133012  |
| rs3803792  | 17 | 72277879  | DNAI2         | ENSE00002271888 | 72277651  | 72278139  |
| rs3803792  | 17 | 72277879  | DNAI2         | ENSE00002271888 | 72277651  | 72278139  |
| rs10512598 | 17 | 73038132  | ATP5H         | ENSE00002718103 | 73037527  | 73038372  |
| rs11077773 | 17 | 73060073  | KCTD2         | ENSE00002715311 | 73059113  | 73061984  |
| rs11077773 | 17 | 73060073  | KCTD2         | ENSE00001307943 | 73059113  | 73061979  |
| rs1128889  | 17 | 74002930  | EVPL          | ENSE00001117959 | 74002926  | 74006624  |
| rs11653662 | 17 | 80071450  | CCDC57        | ENSE00001511537 | 80069862  | 80071641  |
| rs11653662 | 17 | 80071450  | CCDC57        | ENSE00001511537 | 80069862  | 80071641  |
| rs11653662 | 17 | 80071450  | CCDC57        | ENSE00001246985 | 80069868  | 80071641  |
| rs7230037  | 18 | 72914280  | ZADH2         | ENSE00001403351 | 72907063  | 72914295  |
| rs7230037  | 18 | 72914280  | ZADH2         | ENSE00002266862 | 72911412  | 72914295  |
| rs7230037  | 18 | 72914280  | ZADH2         | ENSE00002729031 | 72913672  | 72914295  |
| rs7230037  | 18 | 72914280  | ZADH2         | ENSE00002686241 | 72913833  | 72914295  |
| rs2074639  | 19 | 840984    | PRTN3         | ENSE00001234969 | 840974    | 841069    |
| rs351111   | 19 | 844020    | PRTN3         | ENSE00002818997 | 843893    | 844034    |
| rs351111   | 19 | 844020    | PRTN3         | ENSE00002926212 | 843893    | 844034    |
| rs3803892  | 19 | 14000170  | C19orf57      | ENSE00001055366 | 14000001  | 14001275  |
| rs3803892  | 19 | 14000170  | C19orf57      | ENSE00001055366 | 14000001  | 14001275  |
| rs3803892  | 19 | 14000170  | C19orf57      | ENSE00002955878 | 14000001  | 14000249  |
| rs3803892  | 19 | 14000170  | C19orf57      | ENSE00002768722 | 14000001  | 14000754  |
| rs3803892  | 19 | 14000170  | C19orf57      | ENSE00001055366 | 14000001  | 14001275  |
| rs4072287  | 19 | 18475675  | PGPEP1        | ENSE00000951782 | 18474201  | 18480763  |
| rs10415880 | 19 | 50189156  | PRMT1         | ENSE00002142490 | 50188981  | 50189500  |
| rs17740650 | 19 | 52130488  | SIGLEC5       | ENSE00002969571 | 52130402  | 52130501  |
| rs17740650 | 19 | 52130488  | SIGLEC5       | ENSE00002784699 | 52130402  | 52130501  |
| rs17740650 | 19 | 52130488  | SIGLEC5       | ENSE00002784699 | 52130402  | 52130501  |
| rs6509933  | 19 | 55683104  | SYT5          | ENSE00002772593 | 55682567  | 55685052  |
| rs6509933  | 19 | 55683104  | SYT5          | ENSE00002764071 | 55682591  | 55685052  |
| rs6509933  | 19 | 55683104  | SYT5          | ENSE00002898194 | 55683055  | 55683149  |
| rs13585    | 22 | 46753179  | TRMU          | ENSE00001660722 | 46752739  | 46753232  |
| rs13585    | 22 | 46753179  | TRMU          | ENSE00001609244 | 46752739  | 46753234  |

|           |    |          |            |                 |          |          |
|-----------|----|----------|------------|-----------------|----------|----------|
| rs13585   | 22 | 46753179 | TRMU       | ENSE00001609244 | 46752739 | 46753234 |
| rs13585   | 22 | 46753179 | TRMU       | ENSE00001609244 | 46752739 | 46753234 |
| rs13585   | 22 | 46753179 | TRMU       | ENSE00001609244 | 46752739 | 46753234 |
| rs13585   | 22 | 46753179 | TRMU       | ENSE00001868921 | 46752739 | 46753237 |
| rs13585   | 22 | 46753179 | TRMU       | ENSE00001927271 | 46751341 | 46753234 |
| rs13585   | 22 | 46753179 | TRMU       | ENSE00001878208 | 46752739 | 46753236 |
| rs13585   | 22 | 46753179 | TRMU       | ENSE00001900691 | 46752739 | 46753235 |
| rs3213445 | 22 | 51015838 | CPT1B      | ENSE00002918594 | 51015753 | 51015892 |
| rs3213445 | 22 | 51015838 | CPT1B      | ENSE00002918594 | 51015753 | 51015892 |
| rs3213445 | 22 | 51015838 | CPT1B      | ENSE00002918594 | 51015753 | 51015892 |
| rs3213445 | 22 | 51015838 | CPT1B      | ENSE00001916095 | 51015785 | 51015892 |
| rs3213445 | 22 | 51015838 | CPT1B      | ENSE00002810716 | 51015753 | 51015892 |
| rs3213445 | 22 | 51015838 | CPT1B      | ENSE00002918594 | 51015753 | 51015892 |
| rs3213445 | 22 | 51015838 | CPT1B      | ENSE00002918594 | 51015753 | 51015892 |
| rs3213445 | 22 | 51015838 | CPT1B      | ENSE00002918594 | 51015753 | 51015892 |
| rs3213445 | 22 | 51015838 | CPT1B      | ENSE00002918594 | 51015753 | 51015892 |
| rs3213445 | 22 | 51015838 | CPT1B      | ENSE00002918594 | 51015753 | 51015892 |
| rs3213445 | 22 | 51015838 | CPT1B      | ENSE00002810716 | 51015753 | 51015892 |
| rs3213445 | 22 | 51015838 | CHKB-CPT1B | ENSE00002780900 | 51015753 | 51015892 |
| rs3213445 | 22 | 51015838 | CHKB-CPT1B | ENSE00002780900 | 51015753 | 51015892 |

**Supplemental table S7:**

Model-based Gene Set Analysis comparing 598 SNPs and GWA studies available at GWASdb.

| <b>Enriched phenotype</b>                                | <b>SNPs in population</b> | <b>SNPs in study</b> | <b>Score</b> | <b>Standard error</b> | <b>SNP</b>                                                    |
|----------------------------------------------------------|---------------------------|----------------------|--------------|-----------------------|---------------------------------------------------------------|
| Hepatitis B                                              | 14                        | 6                    | 9.99E-01     | 5.18E-04              | rs9277535, rs2395309, rs3077, rs2301220, rs3117222, rs3128917 |
| Cognitive performance                                    | 550                       | 2                    | 0.00E+00     | 0.00E+00              | rs4597375, rs6600234                                          |
| Serum markers of iron status                             | 67                        | 2                    | 0.00E+00     | 0.00E+00              | rs6773354, rs6794945                                          |
| Primary tooth development (time to first tooth eruption) | 7                         | 1                    | 1.46E-02     | 7.55E-04              | rs9674544                                                     |
| Primary tooth development (number of teeth)              | 10                        | 1                    | 5.01E-03     | 5.26E-04              | rs9674544                                                     |
| Progressive supranuclear palsy                           | 12                        | 1                    | 2.67E-03     | 3.29E-04              | rs7571971                                                     |
| Hepatitis B vaccine response                             | 4                         | 1                    | 1.50E-03     | 4.84E-05              | rs9277535                                                     |
| Information processing speed                             | 26                        | 1                    | 6.48E-05     | 1.98E-05              | rs11077773                                                    |
| Attention deficit hyperactivity disorder                 | 80                        | 1                    | 0.00E+00     | 0.00E+00              | rs2290416                                                     |
| Crohn`s disease                                          | 113                       | 1                    | 0.00E+00     | 0.00E+00              | rs7714584                                                     |
| Menarche (age at onset)                                  | 63                        | 1                    | 0.00E+00     | 0.00E+00              | rs900145                                                      |
| HIV-1 control                                            | 53                        | 1                    | 0.00E+00     | 0.00E+00              | rs12122100                                                    |

**Supplemental table S8:**10 HBV-associated SNPs associated to 17 CpG sites (Pearson's correlation,  $\rho > 0.6$ ).

| Gene symbol | Gene feature | TargetID   | SNP ID     | Pearson's correlation |
|-------------|--------------|------------|------------|-----------------------|
| HLA-DPA1    | Promoter     | cg15253861 | rs3077     | 0.87                  |
| HLA-DPA1    | Promoter     | cg15253861 | rs2395309  | 0.87                  |
| HLA-DPA1    | Promoter     | cg05366160 | rs3077     | 0.84                  |
| HLA-DPA1    | Promoter     | cg05366160 | rs2395309  | 0.84                  |
| HLA-DPA1    | Promoter     | cg20981163 | rs3117222  | 0.82                  |
| HLA-DPA1    | Promoter     | cg17294865 | rs3117222  | 0.77                  |
| HLA-DPA1    | Promoter     | cg02904996 | rs3077     | 0.69                  |
| HLA-DPA1    | Promoter     | cg02904996 | rs2395309  | 0.67                  |
| HLA-DPA1    | Promoter     | cg15253861 | rs9277341  | 0.67                  |
| HLA-DPA1    | Promoter     | cg05366160 | rs9277341  | 0.65                  |
| HLA-DPA1    | Promoter     | cg20981163 | rs2301220  | 0.60                  |
| HLA-DPA1    | Promoter     | cg20981163 | rs3077     | -0.60                 |
| HLA-DPA1    | Promoter     | cg17294865 | rs3077     | -0.60                 |
| HLA-DPA1    | Promoter     | cg20981163 | rs2395309  | -0.60                 |
| HLA-DPA1    | Promoter     | cg17294865 | rs2395309  | -0.61                 |
| HLA-DPA1    | Promoter     | cg17294865 | rs9277535  | -0.65                 |
| HLA-DPA1    | Promoter     | cg02904996 | rs2301220  | -0.68                 |
| HLA-DPA1    | Promoter     | cg20981163 | rs9277535  | -0.69                 |
| HLA-DPA1    | Promoter     | cg17294865 | rs3128917  | -0.77                 |
| HLA-DPA1    | Promoter     | cg20981163 | rs3128917  | -0.82                 |
| HLA-DPA1    | Promoter     | cg05366160 | rs2301220  | -0.84                 |
| HLA-DPA1    | Promoter     | cg15253861 | rs2301220  | -0.87                 |
| HLA-DPA1    | Body         | cg13661648 | rs2301220  | 0.97                  |
| HLA-DPA1    | Body         | cg12858166 | rs2301220  | 0.96                  |
| HLA-DPA1    | Body         | cg25283336 | rs2301220  | 0.92                  |
| HLA-DPA1    | Body         | cg09737870 | rs2395309  | 0.90                  |
| HLA-DPA1    | Body         | cg09737870 | rs3077     | 0.90                  |
| HLA-DPA1    | Body         | cg11437465 | rs2301220  | 0.89                  |
| HLA-DPA1    | Body         | cg18715193 | rs2301220  | 0.85                  |
| HLA-DPA1    | Body         | cg14302130 | rs2301220  | 0.82                  |
| HLA-DPA1    | Body         | cg05751055 | rs2301220  | 0.81                  |
| HLA-DPA1    | Body         | cg05995528 | rs2395309  | 0.79                  |
| HLA-DPA1    | Body         | cg05995528 | rs3077     | 0.79                  |
| HLA-DPA1    | Body         | cg15680603 | rs2301220  | 0.77                  |
| HLA-DPA1    | Body         | cg22037249 | rs2301220  | 0.77                  |
| HLA-DPA1    | Body         | cg09737870 | rs9277341  | 0.72                  |
| HLA-DPA1    | Body         | cg23195763 | rs2281388  | 0.70                  |
| HLA-DPA1    | Body         | cg23195763 | rs9380343  | 0.69                  |
| HLA-DPA1    | Body         | cg23195763 | rs10484569 | 0.65                  |
| HLA-DPA1    | Body         | cg05995528 | rs9277341  | 0.62                  |
| HLA-DPA1    | Body         | cg23195763 | rs2301220  | 0.62                  |
| HLA-DPA1    | Body         | cg23195763 | rs2395309  | -0.60                 |
| HLA-DPA1    | Body         | cg23195763 | rs3077     | -0.61                 |
| HLA-DPA1    | Body         | cg05751055 | rs9277341  | -0.62                 |
| HLA-DPA1    | Body         | cg22037249 | rs9277341  | -0.63                 |
| HLA-DPA1    | Body         | cg14302130 | rs9277341  | -0.64                 |
| HLA-DPA1    | Body         | cg18715193 | rs9277341  | -0.65                 |
| HLA-DPA1    | Body         | cg11437465 | rs9277341  | -0.67                 |
| HLA-DPA1    | Body         | cg25283336 | rs9277341  | -0.72                 |
| HLA-DPA1    | Body         | cg12858166 | rs9277341  | -0.76                 |
| HLA-DPA1    | Body         | cg22037249 | rs3077     | -0.76                 |
| HLA-DPA1    | Body         | cg22037249 | rs2395309  | -0.76                 |
| HLA-DPA1    | Body         | cg15680603 | rs2395309  | -0.76                 |
| HLA-DPA1    | Body         | cg15680603 | rs3077     | -0.77                 |
| HLA-DPA1    | Body         | cg13661648 | rs9277341  | -0.77                 |

|          |      |            |           |       |
|----------|------|------------|-----------|-------|
| HLA-DPA1 | Body | cg05995528 | rs2301220 | -0.78 |
| HLA-DPA1 | Body | cg05751055 | rs2395309 | -0.81 |
| HLA-DPA1 | Body | cg05751055 | rs3077    | -0.81 |
| HLA-DPA1 | Body | cg14302130 | rs2395309 | -0.82 |
| HLA-DPA1 | Body | cg14302130 | rs3077    | -0.82 |
| HLA-DPA1 | Body | cg18715193 | rs2395309 | -0.86 |
| HLA-DPA1 | Body | cg18715193 | rs3077    | -0.86 |
| HLA-DPA1 | Body | cg11437465 | rs2395309 | -0.89 |
| HLA-DPA1 | Body | cg09737870 | rs2301220 | -0.89 |
| HLA-DPA1 | Body | cg11437465 | rs3077    | -0.89 |
| HLA-DPA1 | Body | cg25283336 | rs3077    | -0.93 |
| HLA-DPA1 | Body | cg25283336 | rs2395309 | -0.93 |
| HLA-DPA1 | Body | cg12858166 | rs2395309 | -0.97 |
| HLA-DPA1 | Body | cg12858166 | rs3077    | -0.97 |
| HLA-DPA1 | Body | cg13661648 | rs2395309 | -0.98 |
| HLA-DPA1 | Body | cg13661648 | rs3077    | -0.98 |
